# Supplementary material
Source: publisher figshare collection journal article supplement (https://gsajournals.figshare.com/articles/dataset/_/7928192)
Supplement: Supplementary file 2 [file 2]

**Supplementary Table S6.** AMOVA  $\Phi_{ST}$  estimates for the three *NAT* genes between pairs of *Pan* species and sub-species.

Except for the analyses involving the San Diego sample, all results are shown as  $\Phi_{ST}$  values, with associated *P*-values in brackets (adjusted *P*-values after slash). For analyses involving the San Diego sample, the proportion of significant *P*-values associated with the 122 sub-samples is reported. Significant values are shown in bold.

|             | <i>P. t. verus</i> (San Diego sample) | <i>P. t. ellioti</i> | <i>P. t. troglodytes</i>                  | <i>P. t. schweinfurthii</i>               | <i>P. paniscus</i>                        |                                           |
|-------------|---------------------------------------|----------------------|-------------------------------------------|-------------------------------------------|-------------------------------------------|-------------------------------------------|
| <b>NAT1</b> | <i>P. t. verus</i> (BPRC sample)      | 0 %                  | 0.068<br>(0.04 / 0.24)                    | 0.026<br>(0.26 / 0.78)                    | 0.059<br>(0.06 / 0.30)                    | <b>0.332</b><br><b>(&lt;0.00001 / 0)</b>  |
|             | <i>P. t. verus</i> (San Diego sample) |                      | 0 %                                       | 0 %                                       | 0 %                                       | <b>100 %</b>                              |
|             | <i>P. t. ellioti</i>                  |                      |                                           | 0<br>(0.35 / 0.78)                        | 0.032<br>(0.19 / 0.76)                    | <b>0.315</b><br><b>(&lt;0.00001 / 0)</b>  |
|             | <i>P. t. troglodytes</i>              |                      |                                           |                                           | 0<br>(0.76 / 0.78)                        | <b>0.271</b><br><b>(0.001 / 0)</b>        |
|             | <i>P. t. schweinfurthii</i>           |                      |                                           |                                           |                                           | <b>0.270</b><br><b>(0.0004 / 0)</b>       |
| <b>NAT2</b> | <i>P. t. verus</i> (BPRC sample)      | 0 %                  | <b>0.739</b><br><b>(&lt; 0.00001 / 0)</b> | <b>0.730</b><br><b>(&lt; 0.00001 / 0)</b> | <b>0.781</b><br><b>(&lt; 0.00001 / 0)</b> | <b>0.915</b><br><b>(&lt; 0.00001 / 0)</b> |
|             | <i>P. t. verus</i> (San Diego sample) |                      | <b>100 %</b>                              | <b>100 %</b>                              | <b>100 %</b>                              | <b>100 %</b>                              |
|             | <i>P. t. ellioti</i>                  |                      |                                           | <b>0.675</b><br><b>(&lt; 0.00001 / 0)</b> | <b>0.722</b><br><b>(&lt; 0.00001 / 0)</b> | <b>0.890</b><br><b>(&lt; 0.00001 / 0)</b> |
|             | <i>P. t. troglodytes</i>              |                      |                                           |                                           | 0<br>(0.71 / 0.71)                        | <b>0.778</b><br><b>(&lt; 0.00001 / 0)</b> |
|             | <i>P. t. schweinfurthii</i>           |                      |                                           |                                           |                                           | <b>0.775</b><br><b>(&lt; 0.00001 / 0)</b> |
| <b>NATP</b> | <i>P. t. verus</i> (BPRC sample)      | 75.41 %              | <b>0.418</b><br><b>(&lt; 0.00001 / 0)</b> | <b>0.483</b><br><b>(&lt; 0.00001 / 0)</b> | <b>0.315</b><br><b>(&lt; 0.00001 / 0)</b> | <b>0.951</b><br><b>(&lt; 0.00001 / 0)</b> |
|             | <i>P. t. verus</i> (San Diego sample) |                      | <b>100 %</b>                              | <b>100 %</b>                              | <b>100 %</b>                              | <b>100 %</b>                              |
|             | <i>P. t. ellioti</i>                  |                      |                                           | 0.035<br>(0.20 / 0.40)                    | 0.024<br>(0.24 / 0.40)                    | <b>0.879</b><br><b>(&lt; 0.00001 / 0)</b> |
|             | <i>P. t. troglodytes</i>              |                      |                                           |                                           | 0.093<br>(0.07 / 0.21)                    | <b>0.919</b><br><b>(&lt; 0.00001 / 0)</b> |
|             | <i>P. t. schweinfurthii</i>           |                      |                                           |                                           |                                           | <b>0.940</b><br><b>(&lt; 0.00001 / 0)</b> |
