# Supplementary material
Source: publisher figshare collection journal article supplement (https://gsajournals.figshare.com/articles/dataset/_/7928192)
Supplement: Supplementary file 3 [file 2]

**Supplementary Table S15.** Predictions of the effect of substitutions in human *NAT1* and *NAT2* coding sequences according to PolyPhen, SIFT and PANTHER cSNP Scoring compared to the phenotype assignments of the official nomenclature of human *NAT* alleles (<http://nat.mbg.duth.gr>).

A description of the scores and predictions returned by each of the three online software tools is provided in Supplementary File S1.

| Haplotypes                | Substitution                  |                              | Phenotype assignment<br>( <a href="http://nat.mbg.duth.gr">http://nat.mbg.duth.gr</a> ) | PolyPhen           |                         | SIFT               |                         | PANTHER cSNP Scoring |                         |
|---------------------------|-------------------------------|------------------------------|-----------------------------------------------------------------------------------------|--------------------|-------------------------|--------------------|-------------------------|----------------------|-------------------------|
|                           | cDNA                          | protein                      |                                                                                         | Score <sup>1</sup> | Prediction <sup>2</sup> | Score <sup>3</sup> | Prediction <sup>4</sup> | PSEP <sup>5</sup>    | Prediction <sup>6</sup> |
| <b><i>NAT1</i></b>        |                               |                              |                                                                                         |                    |                         |                    |                         |                      |                         |
| <i>NAT1*4</i> (reference) |                               |                              |                                                                                         |                    |                         |                    |                         |                      |                         |
| <i>NAT1*17</i>            | C190T                         | R64W                         | Lower than <i>NAT1*4</i>                                                                | 1 (0.00 -1.00)     | PRD                     | 0 (3.07, 81)       | A                       | 4200                 | PRD                     |
| <i>NAT1*22</i>            | A752T                         | D251V                        | Lower than <i>NAT1*4</i>                                                                | 1 (0.00-1.00)      | PRD                     | 0 (3.07, 80)       | A                       | 455                  | PRD                     |
| <i>NAT1*14B</i>           | G560A                         | R187Q                        | Lower than <i>NAT1*4</i>                                                                | 0.772 (0.85-0.92)  | POD                     | 0.54 (3.07, 81)    | T                       | 455                  | PRD                     |
| <i>NAT1*21</i>            | A613G                         | M205V                        | Equivalent to <i>NAT1*4</i>                                                             | 0 (1.00-0.00)      | B                       | 1 (3.07, 81)       | T                       | 91                   | B                       |
| <i>NAT1*24</i>            | G781A                         | E261K                        | Equivalent to <i>NAT1*4</i>                                                             | 0.008 (0.96-0.76)  | B                       | 0.03 (3.07, 80)    | A                       | 455                  | PRD                     |
| <i>NAT1*25</i>            | A787G                         | I263V                        | Equivalent to <i>NAT1*4</i>                                                             | 0 (1.00-0.00)      | B                       | 0.95 (3.07, 80)    | T                       | 220                  | POD                     |
| <i>NAT1*30</i>            | G445A                         | V149I                        | Unknown                                                                                 | 0 (1.00-0.00)      | B                       | 1 (3.07, 81)       | T                       | 6                    | B                       |
| <b><i>NAT2</i></b>        |                               |                              |                                                                                         |                    |                         |                    |                         |                      |                         |
| <i>NAT2*4</i> (reference) |                               |                              |                                                                                         |                    |                         |                    |                         |                      |                         |
|                           |                               |                              | Rapid                                                                                   |                    |                         |                    |                         |                      |                         |
| <i>NAT2*12A</i>           | A803G                         | K268R                        | Rapid                                                                                   | 0.011 (0.96-0.78)  | B                       | 0.23 (3.24, 51)    | T                       | 176                  | B                       |
| <i>NAT2*19</i>            | C190T                         | R64W                         | Slow                                                                                    | 1 (0.00-1.00)      | PRD                     | 0 (3.08, 51)       | A                       | 4200                 | PRD                     |
| <i>NAT2*14A</i>           | G191A                         | R64Q                         | Slow                                                                                    | 1 (0.00-1.00)      | PRD                     | 0 (3.18, 53)       | A                       | 4200                 | PRD                     |
| <i>NAT2*5D</i>            | T341C                         | I114T                        | Slow                                                                                    | 0.359 (0.90-0.89)  | B                       | 0.04 (3.18, 53)    | A                       | 220                  | POD                     |
| <i>NAT2*17</i>            | A434C                         | Q145P                        | Slow                                                                                    | 1 (0.00-1.00)      | PRD                     | 0 (3.18, 54)       | A                       | 456                  | PRD                     |
| <i>NAT2*6B</i>            | G590A                         | R197Q                        | Slow                                                                                    | 1 (0.00- 1.00)     | PRD                     | 0.01 (3.18, 54)    | A                       | 842                  | PRD                     |
| <i>NAT2*18</i>            | A845C                         | K282T                        | Rapid                                                                                   | 0.999 (0.14-0.99)  | PRD                     | 0.03 (3.39, 46)    | A                       | 220                  | POD                     |
| <i>NAT2*7A</i>            | G857A                         | G286E                        | Slow <sup>7</sup>                                                                       | 0.317 (0.90-0.89)  | B                       | 0.62 (3.69, 42)    | T                       | 31                   | B                       |
| <i>NAT2*10</i>            | G499A                         | E167K                        | Slow <sup>7</sup>                                                                       | 0.001 (0.99-0.15)  | B                       | 1 (3.18, 54)       | T                       | 176                  | B                       |
| <i>NAT2*13B</i>           | C578T<br>(C282T) <sup>8</sup> | T193M<br>(Y94Y) <sup>8</sup> | Unknown <sup>9</sup>                                                                    | 1 (0.00-1.00)      | PRD                     | 0 (3.18, 54)       | A                       | 456                  | PRD                     |

<sup>1</sup> PolyPhen score : probability that a substitution is damaging; sensibility and specificity in brackets.

<sup>2</sup> PolyPhen prediction : “benign” (B), “possibly damaging” (POD), “probably damaging” (PRD).

<sup>3</sup> SIFT score : probability that a substitution is tolerated; median sequence information and number of sequences used for the prediction in brackets.

<sup>4</sup> SIFT prediction : T: “tolerated” (T), A: “affect protein function” (A).

<sup>5</sup> PANTHER cSNP Scoring PSEP (position-specific evolutionary preservation) : length of time (in millions of years) of preservation of a position.

<sup>6</sup> PANTHER cSNP Scoring prediction : "probably damaging" (PRD), "possibly damaging" (POD), "probably benign" (B).

<sup>7</sup> The official nomenclature of human *NAT2* alleles reports the phenotype as “Slow, Substrate dependent ?”.

<sup>8</sup> The official nomenclature of human *NAT2* alleles has synonymous SNP C282T (Y94Y) as signature mutation of all *NAT2\*13* haplotypes.

<sup>9</sup> No phenotype assignment provided in the official nomenclature of human *NAT2* alleles; the substitution has been predicted (with in-silico tools) as damaging by (Patin et al. 2006b).

## Reference

Patin E, Harmant C, Kidd KK, Kidd J, Froment A, Mehdi SQ, Sica L, Heyer E, and Quintana-Murci L. 2006. Sub-Saharan African coding sequence variation and haplotype diversity at the *NAT2* gene. *Hum Mutat* 27(7):720.
