# Supplementary material
Source: publisher figshare collection journal article supplement (https://gsajournals.figshare.com/articles/dataset/_/7928192)
Supplement: Supplementary file 5 [file 2]

**Supplementary Table S12.** Results of selective neutrality tests for the three *NAT* gene paralogs in human populations.

| ID                        | Population                                                    | Ewens-Watterson test <sup>1</sup> |                      |                              | Tajima's <i>D</i> test <sup>2</sup> |                      | Fu's <i>F<sub>S</sub></i> test <sup>3</sup> |                              |
|---------------------------|---------------------------------------------------------------|-----------------------------------|----------------------|------------------------------|-------------------------------------|----------------------|---------------------------------------------|------------------------------|
|                           |                                                               | <i>F<sub>o</sub></i>              | <i>F<sub>e</sub></i> | <i>P</i> -value              | <i>D</i>                            | <i>P</i> -value      | <i>F<sub>S</sub></i>                        | <i>P</i> -value              |
| <b><i>NAT1</i></b>        |                                                               |                                   |                      |                              |                                     |                      |                                             |                              |
| <i>Sub-Saharan Africa</i> |                                                               |                                   |                      |                              |                                     |                      |                                             |                              |
| 2                         | Yoruba in Ibadan, Nigeria <sup>4</sup>                        | 0.966                             | 0.701                | 0.968                        | -1.457                              | <u>0.022 (0.210)</u> | -3.173                                      | <u>0.005 (0.080)</u>         |
| 4                         | Luhya in Webuye, Kenya <sup>4</sup>                           | 0.939                             | 0.606                | 0.970                        | -1.627                              | <u>0.010 (0.140)</u> | -3.241                                      | <u>0.018 (0.216)</u>         |
| 5                         | Maasai of Tanzania <sup>5</sup>                               | 0.881                             | 0.597                | <b>&gt;0.999 (&gt;0.999)</b> | -1.889                              | <u>0.007 (0.112)</u> | -1.192                                      | 0.141                        |
| 6                         | Turu of Tanzania <sup>5</sup>                                 | 0.881                             | 0.597                | <b>&gt;0.999 (&gt;0.999)</b> | -1.730                              | <u>0.016 (0.180)</u> | -1.708                                      | 0.021                        |
| 7                         | Burunge of Tanzania <sup>5</sup>                              | 0.943                             | 0.763                | <b>&gt;0.999 (&gt;0.999)</b> | -1.138                              | 0.034                | -1.315                                      | 0.055                        |
| 8                         | Hadza of Tanzania <sup>5</sup>                                | 0.729                             | 0.598                | 0.782                        | 0.006                               | 0.611                | 0.096                                       | 0.420                        |
| 9                         | Sandawe of Tanzania <sup>5</sup>                              | 0.716                             | 0.416                | 0.972                        | -1.731                              | <u>0.015 (0.180)</u> | -2.189                                      | 0.045                        |
| 10                        | Biaka Pygmy of C.A.R. (CEPH) <sup>5</sup>                     | 0.873                             | 0.595                | <b>&gt;0.999 (&gt;0.999)</b> | -1.507                              | 0.038                | -2.355                                      | <u>0.007 (0.098)</u>         |
| <i>East Asia</i>          |                                                               |                                   |                      |                              |                                     |                      |                                             |                              |
| 11                        | Han Chinese in Beijing, China <sup>4</sup>                    | 0.949                             | 0.472                | <b>&gt;0.999 (&gt;0.999)</b> | -1.896                              | <b>0.001 (0.019)</b> | -9.910                                      | <b>&lt;0.001 (&lt;0.001)</b> |
| 12                        | Southern Han Chinese <sup>4</sup>                             | 0.990                             | 0.831                | <b>&gt;0.999 (&gt;0.999)</b> | -0.952                              | 0.051                | -2.807                                      | <u>0.008 (0.104)</u>         |
| 13                        | Japanese in Tokyo, Japan <sup>4</sup>                         | 0.978                             | 0.830                | 0.817                        | -1.421                              | 0.027                | -0.764                                      | 0.135                        |
| 14                        | Cambodian (CEPH) <sup>5</sup>                                 | n.a. <sup>7</sup>                 | n.a. <sup>7</sup>    | n.a. <sup>7</sup>            | n.a. <sup>7</sup>                   | n.a. <sup>7</sup>    | n.a. <sup>7</sup>                           | n.a. <sup>7</sup>            |
| <i>Europe</i>             |                                                               |                                   |                      |                              |                                     |                      |                                             |                              |
| 15                        | Toscani in Italia <sup>4</sup>                                | 0.874                             | 0.530                | 0.959                        | -1.466                              | 0.035                | -2.614                                      | 0.131                        |
| 16                        | Utah Residents (CEPH) with N&W European Ancestry <sup>4</sup> | 0.876                             | 0.524                | 0.965                        | -1.554                              | <u>0.021 (0.210)</u> | -2.953                                      | 0.052                        |
| 17                        | British in England and Scotland <sup>4</sup>                  | 0.862                             | 0.524                | 0.959                        | -1.440                              | 0.043                | -2.400                                      | 0.142                        |
| 18                        | Finnish in Finland <sup>4</sup>                               | 0.897                             | 0.529                | <u>0.977 (0.747)</u>         | -1.799                              | <u>0.003 (0.054)</u> | -5.262                                      | <b>0.001 (0.017)</b>         |
| <i>America</i>            |                                                               |                                   |                      |                              |                                     |                      |                                             |                              |
| 19                        | Mexican Ancestry from Los Angeles USA <sup>4</sup>            | 0.955                             | 0.684                | 0.966                        | -1.621                              | <u>0.012 (0.156)</u> | -2.132                                      | 0.078                        |
| 20                        | Puerto Ricans from Puerto Rico <sup>4</sup>                   | 0.964                             | 0.680                | <b>&gt;0.999 (&gt;0.999)</b> | -1.764                              | <u>0.003 (0.054)</u> | -2.878                                      | <u>0.006 (0.090)</u>         |
| 21                        | Colombians from Medellin, Colombia <sup>4</sup>               | 0.919                             | 0.677                | 0.874                        | -1.458                              | 0.034                | -1.187                                      | 0.196                        |
| 22                        | Americans of African Ancestry in SW USA <sup>4</sup>          | 0.952                             | 0.583                | <b>&gt;0.999 (&gt;0.999)</b> | -1.580                              | <u>0.009 (0.135)</u> | -6.153                                      | <b>&lt;0.001 (&lt;0.001)</b> |

---

**NAT2***Sub-Saharan Africa*

|    |                                           |       |       |       |        |       |        |                      |
|----|-------------------------------------------|-------|-------|-------|--------|-------|--------|----------------------|
| 2  | Yoruba in Ibadan, Nigeria <sup>4</sup>    | 0.115 | 0.150 | 0.233 | -0.312 | 0.441 | -5.777 | 0.045                |
| 3  | Mandenka of Senegal <sup>6</sup>          | 0.167 | 0.197 | 0.403 | 0.628  | 0.780 | -2.178 | 0.265                |
| 4  | Luhya in Webuye, Kenya <sup>4</sup>       | 0.175 | 0.164 | 0.688 | 0.165  | 0.635 | -3.752 | 0.134                |
| 6  | Turu of Tanzania <sup>5</sup>             | 0.149 | 0.132 | 0.809 | -0.071 | 0.522 | -4.848 | <u>0.012 (0.204)</u> |
| 7  | Burunge of Tanzania <sup>5</sup>          | 0.194 | 0.196 | 0.596 | 0.546  | 0.745 | -1.303 | 0.290                |
| 9  | Sandawe of Tanzania <sup>5</sup>          | 0.199 | 0.200 | 0.597 | 0.554  | 0.749 | -1.609 | 0.237                |
| 10 | Biaka Pygmy of C.A.R. (CEPH) <sup>5</sup> | 0.207 | 0.165 | 0.873 | -0.981 | 0.175 | -5.033 | <u>0.003 (0.054)</u> |

*East Asia*

|    |                                            |       |       |       |        |       |       |       |
|----|--------------------------------------------|-------|-------|-------|--------|-------|-------|-------|
| 11 | Han Chinese in Beijing, China <sup>4</sup> | 0.427 | 0.469 | 0.480 | 0.024  | 0.573 | 0.822 | 0.689 |
| 12 | Southern Han Chinese <sup>4</sup>          | 0.351 | 0.421 | 0.392 | 0.410  | 0.706 | 0.677 | 0.668 |
| 13 | Japanese in Tokyo, Japan <sup>4</sup>      | 0.465 | 0.525 | 0.444 | -0.121 | 0.512 | 1.415 | 0.773 |

*Europe*

|    |                                                               |       |       |       |       |                      |       |       |
|----|---------------------------------------------------------------|-------|-------|-------|-------|----------------------|-------|-------|
| 15 | Toscana in Italia <sup>4</sup>                                | 0.297 | 0.342 | 0.441 | 1.705 | 0.951                | 1.557 | 0.759 |
| 16 | Utah Residents (CEPH) with N&W European Ancestry <sup>4</sup> | 0.282 | 0.369 | 0.293 | 1.612 | 0.943                | 2.043 | 0.809 |
| 17 | British in England and Scotland <sup>4</sup>                  | 0.276 | 0.414 | 0.162 | 2.229 | <u>0.982 (0.760)</u> | 3.108 | 0.875 |
| 18 | Finnish in Finland <sup>4</sup>                               | 0.279 | 0.417 | 0.165 | 2.179 | <u>0.979 (0.760)</u> | 3.083 | 0.872 |

*America*

|    |                                                      |       |       |       |        |       |        |       |
|----|------------------------------------------------------|-------|-------|-------|--------|-------|--------|-------|
| 19 | Mexican Ancestry from Los Angeles USA <sup>4</sup>   | 0.244 | 0.289 | 0.405 | 0.688  | 0.791 | 0.244  | 0.597 |
| 20 | Puerto Ricans from Puerto Rico <sup>4</sup>          | 0.222 | 0.278 | 0.329 | 1.131  | 0.884 | 0.243  | 0.594 |
| 21 | Colombians from Medellin, Colombia <sup>4</sup>      | 0.281 | 0.347 | 0.351 | 1.279  | 0.907 | 1.343  | 0.744 |
| 22 | Americans of African Ancestry in SW USA <sup>4</sup> | 0.146 | 0.162 | 0.463 | -0.156 | 0.504 | -3.804 | 0.107 |

---

**NATP***Sub-Saharan Africa*

|   |                                        |       |       |       |        |       |        |                      |
|---|----------------------------------------|-------|-------|-------|--------|-------|--------|----------------------|
| 1 | Dinka of Soudan <sup>5</sup>           | 0.209 | 0.165 | 0.877 | -0.394 | 0.394 | -5.805 | <u>0.001 (0.018)</u> |
| 2 | Yoruba in Ibadan, Nigeria <sup>4</sup> | 0.159 | 0.159 | 0.605 | -0.027 | 0.556 | -4.590 | 0.083                |
| 4 | Luhya in Webuye, Kenya <sup>4</sup>    | 0.183 | 0.164 | 0.730 | -0.163 | 0.503 | -4.741 | 0.077                |
| 6 | Turu of Tanzania <sup>5</sup>          | 0.211 | 0.283 | 0.171 | 0.017  | 0.556 | -0.820 | 0.344                |
| 7 | Burunge of Tanzania <sup>5</sup>       | 0.241 | 0.298 | 0.296 | -0.298 | 0.432 | -1.573 | 0.171                |

|                  |                                                               |       |       |                      |        |       |        |                      |
|------------------|---------------------------------------------------------------|-------|-------|----------------------|--------|-------|--------|----------------------|
| 9                | Sandawe of Tanzania <sup>5</sup>                              | 0.343 | 0.200 | <u>0.975 (0.880)</u> | -0.595 | 0.313 | -4.665 | <u>0.005 (0.085)</u> |
| 10               | Biaka Pygmy of C.A.R. (CEPH) <sup>5</sup>                     | 0.187 | 0.186 | 0.608                | -0.333 | 0.415 | -4.349 | <u>0.006 (0.096)</u> |
| <i>East Asia</i> |                                                               |       |       |                      |        |       |        |                      |
| 11               | Han Chinese in Beijing, China <sup>4</sup>                    | 0.351 | 0.378 | 0.516                | 0.480  | 0.728 | 1.036  | 0.712                |
| 12               | Southern Han Chinese <sup>4</sup>                             | 0.338 | 0.344 | 0.581                | 0.237  | 0.651 | 0.526  | 0.642                |
| 13               | Japanese in Tokyo, Japan <sup>4</sup>                         | 0.319 | 0.306 | 0.646                | 0.724  | 0.797 | 0.002  | 0.559                |
| <i>Europe</i>    |                                                               |       |       |                      |        |       |        |                      |
| 15               | Toscani in Italia <sup>4</sup>                                | 0.265 | 0.312 | 0.420                | 0.417  | 0.707 | -0.866 | 0.413                |
| 16               | Utah Residents (CEPH) with N&W European Ancestry <sup>4</sup> | 0.270 | 0.304 | 0.464                | -0.314 | 0.437 | -0.686 | 0.442                |
| 17               | British in England and Scotland <sup>4</sup>                  | 0.297 | 0.336 | 0.463                | 0.416  | 0.703 | -0.357 | 0.496                |
| 18               | Finnish in Finland <sup>4</sup>                               | 0.252 | 0.309 | 0.365                | 0.347  | 0.690 | -0.344 | 0.504                |
| <i>America</i>   |                                                               |       |       |                      |        |       |        |                      |
| 19               | Mexican Ancestry from Los Angeles USA <sup>4</sup>            | 0.258 | 0.264 | 0.582                | -0.190 | 0.490 | -1.671 | 0.279                |
| 20               | Puerto Ricans from Puerto Rico <sup>4</sup>                   | 0.261 | 0.277 | 0.534                | -0.311 | 0.436 | -1.470 | 0.294                |
| 21               | Colombians from Medellin, Colombia <sup>4</sup>               | 0.238 | 0.313 | 0.278                | 0.431  | 0.712 | -0.189 | 0.523                |
| 22               | Americans of African Ancestry in SW USA <sup>4</sup>          | 0.206 | 0.237 | 0.436                | -0.125 | 0.514 | -1.323 | 0.342                |

<sup>1</sup> Ewens-Watterson test for departure from selective neutrality and demographic equilibrium;  $F_o$  : observed homozygosity,  $F_e$  : expected homozygosity; the  $P$ -value is given as the proportion of random  $F_e$  values generated under the neutral equilibrium model that are smaller than, or equal to the observed  $F_o$  value. Significant departures ( $P$ -value < 0.025 or > 0.975) are underlined. Significant departures after Holm's correction for multiple testing ( $P$ -values in brackets) are shown in bold.

<sup>2</sup> Tajima's  $D$  test for departure from selective neutrality and demographic equilibrium; the  $P$ -value is given as the proportion of random  $D$  values generated under the neutral equilibrium model that are smaller than, or equal to the observed  $D$  value. Significant departures ( $P$ -value < 0.025 or > 0.975) are underlined. Significant departures after Holm's correction for multiple testing ( $P$ -values in brackets) are shown in bold.

<sup>3</sup> Fu's  $F_s$  test for departure from selective neutrality and demographic equilibrium; the  $P$ -value is given as the proportion of random  $F_s$  values generated under the neutral equilibrium model that are smaller than, or equal to the observed  $F_s$  value. Significant departures ( $P$ -value < 0.02) are underlined. Significant departures after Holm's correction for multiple testing ( $P$ -values in brackets) are shown in bold.

<sup>4</sup> The Genomes Project Consortium (2012). <sup>5</sup> Mortensen et al. (2011). <sup>6</sup> Sabbagh et al. (2008). <sup>7</sup> Not applicable (n.a.).

## References

- Mortensen HM, Froment A, Lema G, Bodo JM, Ibrahim M, Nyambo TB, Omar SA, and Tishkoff SA. 2011. Characterization of genetic variation and natural selection at the arylamine N-acetyltransferase genes in global human populations. *Pharmacogenomics* 12(11):1545-1558.
- Sabbagh A, Langaney A, Darlu P, Gerard N, Krishnamoorthy R, and Poloni ES. 2008. Worldwide distribution of NAT2 diversity: implications for NAT2 evolutionary history. *BMC Genet* 9:21.
- The Genomes Project C. 2012. An integrated map of genetic variation from 1,092 human genomes. *Nature* 491:56.
