# Supplementary material
Source: publisher figshare collection journal article supplement (https://gsajournals.figshare.com/articles/dataset/_/7928192)
Supplement: Supplementary file 6 [file 2]

**Supplementary Table S2.** Available information on the non-human great apes samples considered in the study.

| Species                     | Code of individual<br>(or studybook ID    Name of |             | Sex1 | Origin1 | DNA sample<br>collection2 | NAT1                | GenBank              | NAT2                | GenBank              | NATP                | GenBank              |
|-----------------------------|---------------------------------------------------|-------------|------|---------|---------------------------|---------------------|----------------------|---------------------|----------------------|---------------------|----------------------|
|                             | as reported in GAGP)1                             | individual1 |      |         |                           | phased<br>genotype3 | accession<br>number4 | phased<br>genotype3 | accession<br>number4 | phased<br>genotype3 | accession<br>number4 |
| Pan troglodytes sub-species |                                                   |             |      |         |                           |                     |                      |                     |                      |                     |                      |
| P. t. verus                 | C311                                              | Judumi      | M    | -       | CARTA                     | *1/*1               | MK245079/MK245080    | *1/*4               | MK245233/MK245234    | *2/*6               | MK245386/MK245387    |
| P. t. verus                 | C312                                              | Akimel      | M    | -       | CARTA                     | *1/*2               | MK245081/MK245082    | *1/*1               | MK245235/MK245236    | *1/*2               | MK245388/MK245389    |
| P. t. verus                 | C313                                              | Tanya       | F    | -       | CARTA                     | *1/*1               | MK245083/MK245084    | *1/*1               | MK245237/MK245238    | *2/*7               | MK245390/MK245391    |
| P. t. verus                 | C314                                              | Mohg        | M    | -       | CARTA                     | *1/*3               | MK245085/MK245086    | *1/*1               | MK245239/MK245240    | *7/*8               | MK245392/MK245393    |
| P. t. verus                 | C315                                              | Tohbi       | M    | -       | CARTA                     | *1/*2               | MK245087/MK245088    | *1/*1               | MK245241/MK245242    | *2/*7               | MK245394/MK245395    |
| P. t. verus                 | C316                                              | Tamblo      | M    | -       | CARTA                     | *1/*3               | MK245089/MK245090    | *1/*1               | MK245243/MK245244    | *1/*8               | MK245396/MK245397    |
| P. t. verus                 | C317                                              | Angie       | F    | -       | CARTA                     | *1/*1               | MK245091/MK245092    | *1/*2               | MK245245/MK245246    | *1/*1               | MK245398/MK245399    |
| P. t. verus                 | C318                                              | Reeuh       | M    | -       | CARTA                     | *1/*1               | MK245093/MK245094    | *2/*4               | MK245247/MK245248    | *1/*6               | MK245400/MK245401    |
| P. t. verus                 | C319                                              | Papa        | M    | -       | CARTA                     | *1/*1               | MK245095/MK245096    | *1/*1               | MK245249/MK245250    | *1/*1               | MK245402/MK245403    |
| P. t. verus                 | C320                                              | Patti       | F    | -       | CARTA                     | *1/*1               | MK245097/MK245098    | *1/*1               | MK245251/MK245252    | *1/*7               | MK245404/MK245405    |
| P. t. verus                 | C321                                              | Mahsho      | M    | -       | CARTA                     | *1/*1               | MK245099/MK245100    | *1/*1               | MK245253/MK245254    | *2/*7               | MK245406/MK245407    |
| P. t. verus                 | C322                                              | Miloni      | F    | -       | CARTA                     | *1/*1               | MK245101/MK245102    | *1/*1               | MK245255/MK245256    | *2/*7               | MK245408/MK245409    |
| P. t. verus                 | C323                                              | Pehgia      | F    | -       | CARTA                     | *1/*1               | MK245103/MK245104    | *1/*2               | MK245257/MK245258    | *1/*1               | MK245410/MK245411    |
| P. t. verus                 | C324                                              | Mahi        | F    | -       | CARTA                     | *1/*1               | MK245105/MK245106    | *1/*1               | MK245259/MK245260    | *7/*7               | MK245412/MK245413    |
| P. t. verus                 | C325                                              | Tang        | F    | -       | CARTA                     | *1/*1               | MK245107/MK245108    | *1/*1               | MK245261/MK245262    | *2/*7               | MK245414/MK245415    |
| P. t. verus                 | C326                                              | Tody        | F    | -       | CARTA                     | *1/*1               | MK245109/MK245110    | *1/*1               | MK245263/MK245264    | *1/*2               | MK245416/MK245417    |
| P. t. verus                 | C328                                              | Kakaichu    | F    | -       | CARTA                     | *1/*4               | MK245111/MK245112    | *1/*1               | MK245265/MK245266    | *2/*2               | MK245418/MK245419    |
| P. t. verus                 | C329                                              | Quincy      | F    | -       | CARTA                     | *1/*1               | MK245113/MK245114    | *1/*1               | MK245267/MK245268    | *1/*2               | MK245420/MK245421    |
| P. t. verus                 | C330                                              | Geronimo    | M    | -       | CARTA                     | *1/*3               | MK245115/MK245116    | *1/*1               | MK245269/MK245270    | *2/*8               | MK245422/MK245423    |
| P. t. verus                 | CYN92-49                                          | -           | F    | -       | CARTA                     | *2/*4               | MK245121/MK245122    | *1/*1               | MK245271/MK245272    | *1/*2               | MK245424/MK245425    |
| P. t. verus                 | CYN94_67                                          | -           | F    | -       | CARTA                     | *1/*1               | MK245119/MK245120    | *1/*1               | MK245273/MK245274    | *2/*2               | MK245426/MK245427    |
| P. t. verus                 | CYN98-355                                         | -           | M    | -       | CARTA                     | *1/*2               | MK245127/MK245128    | *1/*4               | MK245275/MK245276    | *2/*7               | MK245428/MK245429    |
| P. t. verus                 | C13605                                            | -           | -    | -       | CARTA                     | *1/*1               | MK245117/MK245118    | *1/*1               | MK245277/MK245278    | *2/*2               | MK245430/MK245431    |
| P. t. verus                 | -                                                 | Fox         | -    | -       | CARTA                     | *1/*5               | MK245125/MK245126    | *1/*1               | MK245279/MK245280    | *2/*2               | MK245432/MK245433    |
| P. t. verus                 | -                                                 | Susie       | F    | -       | CARTA                     | *1/*4               | MK245123/MK245124    | *1/*1               | MK245281/MK245282    | *2/*7               | MK245358/MK245359    |
| P. t. verus                 | 215?                                              | Boscoe      | M    | -       | CARTA (& GAGP)            | *1/*1               | MK245129/MK245130    | *1/*1               | MK245283/MK245284    | *7/*7               | MK245436/MK245437    |
| P. t. verus                 | 691711                                            | Eros        | M    | -       | Basel zoo                 | *1/*1               | MK245131/MK245132    | *1/*1               | MK245285/MK245286    | *1/*2               | MK245438/MK245439    |

|                    |        |           |   |              |           |       |                   |       |                   |       |                   |
|--------------------|--------|-----------|---|--------------|-----------|-------|-------------------|-------|-------------------|-------|-------------------|
| <i>P. t. verus</i> | 741715 | Jacky     | M | -            | Basel zoo | *1/*1 | MK245133/MK245134 | *1/*1 | MK245287/MK245288 | *1/*2 | MK245440/MK245441 |
| <i>P. t. verus</i> | bprc01 | Annaclara | F | -            | BPRC      | *1/*1 | MK244999/MK245000 | *1/*1 | MK245153/MK245154 | *1/*1 | MK245306/MK245307 |
| <i>P. t. verus</i> | bprc02 | Agnetta   | F | -            | BPRC      | *1/*4 | MK245001/MK245002 | *1/*1 | MK245155/MK245156 | *1/*2 | MK245308/MK245309 |
| <i>P. t. verus</i> | bprc03 | Bram      | M | -            | BPRC      | *2/*4 | MK245003/MK245004 | *1/*1 | MK245157/MK245158 | *1/*7 | MK245310/MK245311 |
| <i>P. t. verus</i> | bprc04 | Carolina  | F | Sierra Leone | BPRC      | *1/*1 | MK245005/MK245006 | *1/*1 | MK245159/MK245160 | *1/*2 | MK245312/MK245313 |
| <i>P. t. verus</i> | bprc05 | Centa     | F | -            | BPRC      | *1/*4 | MK245007/MK245008 | *1/*1 | MK245161/MK245162 | *2/*5 | MK245314/MK245315 |
| <i>P. t. verus</i> | bprc06 | Debbie    | F | Sierra Leone | BPRC      | *1/*4 | MK245009/MK245010 | *1/*1 | MK245163/MK245164 | *1/*2 | MK245316/MK245317 |
| <i>P. t. verus</i> | bprc07 | Diana     | F | Sierra Leone | BPRC      | *2/*4 | MK245011/MK245012 | *1/*5 | MK245165/MK245166 | *2/*7 | MK245318/MK245319 |
| <i>P. t. verus</i> | bprc08 | Dirk1     | M | -            | BPRC      | *1/*1 | MK245013/MK245014 | *1/*2 | MK245167/MK245168 | *2/*4 | MK245320/MK245321 |
| <i>P. t. verus</i> | bprc09 | Erik      | M | -            | BPRC      | *1/*1 | MK245015/MK245016 | *1/*1 | MK245169/MK245170 | *2/*2 | MK245322/MK245323 |
| <i>P. t. verus</i> | bprc10 | Femma     | F | -            | BPRC      | *1/*1 | MK245017/MK245018 | *1/*1 | MK245171/MK245172 | *1/*2 | MK245324/MK245325 |
| <i>P. t. verus</i> | bprc11 | Frits     | M | Sierra Leone | BPRC      | *1/*1 | MK245019/MK245020 | *1/*1 | MK245173/MK245174 | *2/*5 | MK245326/MK245327 |
| <i>P. t. verus</i> | bprc12 | Gina      | F | Sierra Leone | BPRC      | *4/*4 | MK245021/MK245022 | *1/*1 | MK245175/MK245176 | *2/*2 | MK245328/MK245329 |
| <i>P. t. verus</i> | bprc13 | Jolanda   | F | Sierra Leone | BPRC      | *1/*1 | MK245023/MK245024 | *1/*1 | MK245177/MK245178 | *1/*1 | MK245330/MK245331 |
| <i>P. t. verus</i> | bprc14 | Karin     | F | Sierra Leone | BPRC      | *1/*4 | MK245025/MK245026 | *1/*1 | MK245181/MK245182 | *2/*2 | MK245332/MK245333 |
| <i>P. t. verus</i> | bprc15 | Lady      | F | Sierra Leone | BPRC      | *1/*1 | MK245027/MK245028 | *1/*1 | MK245179/MK245180 | *1/*2 | MK245334/MK245335 |
| <i>P. t. verus</i> | bprc16 | Liesbeth  | F | Sierra Leone | BPRC      | *1/*1 | MK245029/MK245030 | *1/*1 | MK245183/MK245184 | *1/*2 | MK245336/MK245337 |
| <i>P. t. verus</i> | bprc17 | Louise    | F | Sierra Leone | BPRC      | *1/*1 | MK245031/MK245032 | *1/*1 | MK245185/MK245186 | *1/*1 | MK245338/MK245339 |
| <i>P. t. verus</i> | bprc18 | Marco     | M | Sierra Leone | BPRC      | *1/*1 | MK245033/MK245034 | *1/*2 | MK245187/MK245188 | *2/*4 | MK245340/MK245341 |
| <i>P. t. verus</i> | bprc19 | Olga      | F | -            | BPRC      | *1/*1 | MK245035/MK245036 | *1/*1 | MK245189/MK245190 | *1/*1 | MK245342/MK245343 |
| <i>P. t. verus</i> | bprc20 | Oscar     | M | -            | BPRC      | *1/*1 | MK245037/MK245038 | *1/*1 | MK245191/MK245192 | *1/*2 | MK245344/MK245345 |
| <i>P. t. verus</i> | bprc21 | Pearl     | F | Sierra Leone | BPRC      | *1/*1 | MK245039/MK245040 | *1/*3 | MK245193/MK245194 | *2/*2 | MK245346/MK245347 |
| <i>P. t. verus</i> | bprc22 | Renee     | F | Sierra Leone | BPRC      | *1/*6 | MK245041/MK245042 | *1/*1 | MK245195/MK245196 | *1/*1 | MK245348/MK245349 |
| <i>P. t. verus</i> | bprc23 | Robert    | M | -            | BPRC      | *1/*4 | MK245043/MK245044 | *1/*1 | MK245197/MK245198 | *1/*2 | MK245350/MK245351 |
| <i>P. t. verus</i> | bprc24 | Sonja     | F | Sierra Leone | BPRC      | *1/*1 | MK245045/MK245046 | *1/*1 | MK245199/MK245200 | *1/*2 | MK245352/MK245353 |
| <i>P. t. verus</i> | bprc25 | Sherry    | F | Sierra Leone | BPRC      | *1/*1 | MK245047/MK245048 | *1/*1 | MK245201/MK245202 | *1/*1 | MK245354/MK245355 |
| <i>P. t. verus</i> | bprc26 | Socrates  | M | -            | BPRC      | *1/*4 | MK245049/MK245050 | *1/*1 | MK245203/MK245204 | *1/*2 | MK245356/MK245357 |
| <i>P. t. verus</i> | bprc27 | Susie     | F | Sierra Leone | BPRC      | *1/*1 | MK245051/MK245052 | *1/*1 | MK245205/MK245206 | *1/*2 | MK245434/MK245435 |
| <i>P. t. verus</i> | bprc28 | Toetie    | F | Sierra Leone | BPRC      | *1/*1 | MK245053/MK245054 | *1/*1 | MK245207/MK245208 | *2/*2 | MK245360/MK245361 |
| <i>P. t. verus</i> | bprc29 | Yoko      | F | Sierra Leone | BPRC      | *1/*2 | MK245055/MK245056 | *1/*1 | MK245209/MK245210 | *1/*1 | MK245362/MK245363 |
| <i>P. t. verus</i> | bprc30 | Yvonne    | F | Sierra Leone | BPRC      | *1/*1 | MK245057/MK245058 | *1/*1 | MK245211/MK245212 | *1/*1 | MK245364/MK245365 |
| <i>P. t. verus</i> | bprc31 | Cindy     | F | -            | BPRC      | *1/*1 | MK245059/MK245060 | *2/*2 | MK245213/MK245214 | *4/*4 | MK245366/MK245367 |
| <i>P. t. verus</i> | bprc32 | Christa   | F | -            | BPRC      | *1/*4 | MK245061/MK245062 | *1/*1 | MK245215/MK245216 | *2/*5 | MK245368/MK245369 |
| <i>P. t. verus</i> | bprc33 | Lenny     | M | -            | BPRC      | *1/*1 | MK245063/MK245064 | *1/*2 | MK245217/MK245218 | *1/*1 | MK245370/MK245371 |
| <i>P. t. verus</i> | bprc34 | Zorro     | M | -            | BPRC      | *1/*1 | MK245065/MK245066 | *1/*2 | MK245219/MK245220 | *4/*7 | MK245372/MK245373 |

|                          |        |             |   |              |       |        |                   |       |                   |         |                   |
|--------------------------|--------|-------------|---|--------------|-------|--------|-------------------|-------|-------------------|---------|-------------------|
| <i>P. t. verus</i>       | bprc35 | Marti       | M | -            | BPRC  | *1/*4  | MK245067/MK245068 | *1/*1 | MK245221/MK245222 | *1/*2   | MK245374/MK245375 |
| <i>P. t. verus</i>       | bprc36 | Regina      | F | Sierra Leone | BPRC  | *1/*1  | MK245069/MK245070 | *1/*1 | MK245223/MK245224 | *1/*2   | MK245376/MK245377 |
| <i>P. t. verus</i>       | bprc37 | Yoran       | M | -            | BPRC  | *1/*1  | MK245071/MK245072 | *1/*2 | MK245225/MK245226 | *1/*4   | MK245378/MK245379 |
| <i>P. t. verus</i>       | bprc38 | Joachim     | M | -            | BPRC  | *1/*1  | MK245073/MK245074 | *1/*1 | MK245227/MK245228 | *2/*2   | MK245380/MK245381 |
| <i>P. t. verus</i>       | bprc39 | Bob         | M | -            | BPRC  | *1/*1  | MK245075/MK245076 | *1/*1 | MK245229/MK245230 | *1/*5   | MK245382/MK245383 |
| <i>P. t. verus</i>       | bprc40 | Gerda       | F | -            | BPRC  | *1/*4  | MK245077/MK245078 | *1/*1 | MK245231/MK245232 | *1/*7   | MK245384/MK245385 |
| <i>P. t. verus</i>       | bprc41 | Izaak       | M | Sierra Leone | BPRC  | *1/*4  |                   | *1/*2 |                   | *4/*7   |                   |
| <i>P. t. verus</i>       | bprc42 | Gerrit      | M | Sierra Leone | BPRC  | n.d.   |                   | n.d.  |                   | *1/*2   |                   |
| <i>P. t. verus</i>       | bprc43 | Indira      | F | Sierra Leone | BPRC  | n.d.   |                   | n.d.  |                   | n.d.    |                   |
| <i>P. t. verus</i>       | bprc44 | Jacob       | M | Sierra Leone | BPRC  | n.d.   |                   | n.d.  |                   | n.d.    |                   |
| <i>P. t. verus</i>       | bprc45 | Marga       | F | Sierra Leone | BPRC  | n.d.   |                   | n.d.  |                   | *4/*7   |                   |
| <i>P. t. verus</i>       | bprc46 | Nina        | F | Sierra Leone | BPRC  | n.d.   |                   | n.d.  |                   | n.d.    |                   |
| <i>P. t. verus</i>       | bprc47 | Tasja       | F | Sierra Leone | BPRC  | n.d.   |                   | n.d.  |                   | *2/*1   |                   |
| <i>P. t. verus</i>       | bprc48 | Tineke      | F | Sierra Leone | BPRC  | n.d.   |                   | n.d.  |                   | n.d.    |                   |
| <i>P. t. verus</i>       | bprc49 | Wodka       | F | Sierra Leone | BPRC  | n.d.   |                   | n.d.  |                   | n.d.    |                   |
| <i>P. t. verus</i>       | 10784  | Jimmie      | F | West Africa  | GAGP  | *1/*1  |                   | *1/*1 |                   | *2/*2   |                   |
| <i>P. t. verus</i>       | 650?   | Koby        | M | -            | GAGP  | *1/*1  |                   | *1/*2 |                   | *2/*2   |                   |
| <i>P. t. verus</i>       | C0471  | Clint       | M | -            | GAGP  | *1/*4  |                   | *1/*1 |                   | *2/*2   |                   |
| <i>P. t. ellioti</i>     | LWC038 | Paquita     | F | Cameroon     | GAGP  | *1/*1  |                   | *6/*6 |                   | *2/*15  |                   |
| <i>P. t. ellioti</i>     | LWC046 | Tobi        | F | Cameroon     | GAGP  | *1/*7  |                   | *6/*6 |                   | *2/*8   |                   |
| <i>P. t. ellioti</i>     | LWC12  | Damian      | M | Cameroon     | GAGP  | *1/*10 |                   | *6/*6 |                   | *2/*8   |                   |
| <i>P. t. ellioti</i>     | LWC2   | Akwaya-Jean | M | Cameroon     | GAGP  | *1/*1  |                   | *4/*6 |                   | *2/*15  |                   |
| <i>P. t. ellioti</i>     | LWC21  | Julie       | F | Cameroon     | GAGP  | *7/*10 |                   | *1/*6 |                   | *8/*12  |                   |
| <i>P. t. ellioti</i>     | LWC23  | Kopongo     | F | Cameroon     | GAGP  | *1/*1  |                   | *6/*6 |                   | *2/*15  |                   |
| <i>P. t. ellioti</i>     | LWC24  | Koto        | M | Cameroon     | GAGP  | *1/*1  |                   | *6/*6 |                   | *2/*8   |                   |
| <i>P. t. ellioti</i>     | LWC43  | Taweh       | M | Cameroon     | GAGP  | *2/*10 |                   | *4/*6 |                   | *2/*8   |                   |
| <i>P. t. ellioti</i>     | LWC7   | Banyo       | F | Cameroon     | GAGP  | *1/*1  |                   | *6/*6 |                   | *11/*11 |                   |
| <i>P. t. ellioti</i>     | LWC8   | Basho       | M | Cameroon     | GAGP  | *1/*10 |                   | *6/*6 |                   | *2/*14  |                   |
| <i>P. t. troglodytes</i> | C327   | Bischk      | F | -            | CARTA | *1/*3  | MK245137/MK245138 | *1/*6 | MK245291/MK245292 | *1/*8   | MK245444/MK245445 |
| <i>P. t. troglodytes</i> | 10306? | Julie       | F | Gabon        | GAGP  | *1/*1  |                   | *4/*4 |                   | *2/*16  |                   |
| <i>P. t. troglodytes</i> | -      | Vaillant    | M | Gabon        | GAGP  | *1/*10 |                   | *4/*4 |                   | *8/*9   |                   |
| <i>P. t. troglodytes</i> | -      | Doris       | F | Gabon        | GAGP  | *1/*8  |                   | *4/*4 |                   | *3/*3   |                   |
| <i>P. t. troglodytes</i> | -      | Clara       | F | Gabon        | GAGP  | *1/*1  |                   | *4/*4 |                   | *9/*9   |                   |

|                                |           |           |   |                                 |                            |         |                   |        |   |         |                   |
|--------------------------------|-----------|-----------|---|---------------------------------|----------------------------|---------|-------------------|--------|---|---------|-------------------|
| <i>P. t. schweinfurthii</i>    | ISIS #925 | Harriet   | F | Uganda                          | CARTA (& GAGP)             | *1/*1   | MK245135/MK245136 | *4/*4  | - | *2/*2   | MK245442/MK245443 |
| <i>P. t. schweinfurthii</i>    | BB-042a   | Andromeda | F | Tanzania                        | GAGP<br>(Gombe Natl. Park) | *1/*3   |                   | *4/*10 |   | *2/*8   |                   |
| <i>P. t. schweinfurthii</i>    | Ch-045    | Vincent   | M | Tanzania                        | GAGP<br>(Gombe Natl. Park) | *1/*9   |                   | *4/*4  |   | *2/*10  |                   |
| <i>P. t. schweinfurthii</i>    | -         | Bwambale  | M | Uganda                          | GAGP                       | *1/*1   |                   | *4/*4  |   | *2/*11  |                   |
| <i>P. t. schweinfurthii</i>    | -         | Kidongo   | F | Democratic<br>Republic of Congo | GAGP                       | *10/*11 |                   | *4/*4  |   | *11/*17 |                   |
| <i>P. t. schweinfurthii</i>    | -         | Nakuu     | F | Democratic<br>Republic of Congo | GAGP                       | *1/*1   |                   | *4/*4  |   | *2/*2   |                   |
| <i>P. t. verus/troglodytes</i> | C0551     | Donald    | M | -                               | GAGP                       | *1/*1   |                   | *1/*4  |   | *2/*13  |                   |

#### ***Pan paniscus* species**

|                    |       |           |   |   |       |         |                   |       |                   |         |                   |
|--------------------|-------|-----------|---|---|-------|---------|-------------------|-------|-------------------|---------|-------------------|
| <i>P. paniscus</i> | -     | Bonobo    | - | - | CARTA | *1/*6   | MK245139/MK245140 | *7/*9 | MK245293/MK245294 | *18/*18 | MK245446/MK245447 |
| <i>P. paniscus</i> | LB502 | LB502     | F | - | GAGP  | *6/*12  |                   | *7/*7 |                   | *18/*18 |                   |
| <i>P. paniscus</i> | 52    | Salonga   | F | - | GAGP  | *1/*6   |                   | *7/*7 |                   | *18/*18 |                   |
| <i>P. paniscus</i> | 260   | Kumbuka   | F | - | GAGP  | *1/*6   |                   | *7/*7 |                   | *18/*18 |                   |
| <i>P. paniscus</i> | 91    | Hortense  | F | - | GAGP  | *1/*6   |                   | *7/*7 |                   | *18/*18 |                   |
| <i>P. paniscus</i> | 166   | Kosana    | F | - | GAGP  | *6/*12  |                   | *7/*7 |                   | *18/*19 |                   |
| <i>P. paniscus</i> | 67    | Dzeeta    | F | - | GAGP  | *1/*12  |                   | *7/*7 |                   | *18/*18 |                   |
| <i>P. paniscus</i> | 88    | Hermien   | F | - | GAGP  | *12/*12 |                   | *7/*7 |                   | *18/*18 |                   |
| <i>P. paniscus</i> | 57    | Desmond   | M | - | GAGP  | *1/*6   |                   | *7/*7 |                   | *18/*18 |                   |
| <i>P. paniscus</i> | 55    | Catherine | F | - | GAGP  | *6/*6   |                   | *7/*7 |                   | *18/*18 |                   |
| <i>P. paniscus</i> | 56    | Kombote   | F | - | GAGP  | *6/*6   |                   | *7/*9 |                   | *18/*18 |                   |
| <i>P. paniscus</i> | 220   | Chipita   | F | - | GAGP  | *1/*6   |                   | *7/*8 |                   | *18/*18 |                   |
| <i>P. paniscus</i> | 102   | Bono      | M | - | GAGP  | *6/*6   |                   | *7/*7 |                   | *18/*18 |                   |
| <i>P. paniscus</i> | 46    | Natalie   | F | - | GAGP  | *6/*12  |                   | *7/*7 |                   | *18/*18 |                   |

#### ***Gorilla gorilla* sub-species**

|                          |        |            |   |   |           |          |          |          |          |          |          |
|--------------------------|--------|------------|---|---|-----------|----------|----------|----------|----------|----------|----------|
| <i>G. g.</i> (undefined) | -      | GORYN00-51 | M | - | CARTA     | unphased | MK245148 | unphased | -        | unphased | -        |
| <i>G. g. gorilla</i>     | 960298 | Kisoro     | M | - | Basel zoo | unphased | MK245149 | unphased | MK245295 | unphased | MK245448 |
| <i>G. g. gorilla</i>     | 960297 | Joas       | F | - | Basel zoo | unphased | MK245150 | unphased | MK245296 | unphased | MK245449 |
| <i>G. g. gorilla</i>     | 830293 | Faddama    | F | - | Basel zoo | unphased | MK245151 | unphased | MK245297 | unphased | MK245450 |

|                      |        |            |   |   |           |          |          |          |          |          |          |
|----------------------|--------|------------|---|---|-----------|----------|----------|----------|----------|----------|----------|
| <i>G. g. gorilla</i> | 120305 | Enea       | F | - | Basel zoo | unphased | MK245152 | unphased | MK245298 | unphased | MK245451 |
| <i>G. g. gorilla</i> | 9749   | Kowali     | - | - | GAGP      | unphased |          | unphased |          | unphased |          |
| <i>G. g. gorilla</i> | 9750   | Azizi      | - | - | GAGP      | unphased |          | unphased |          | unphased |          |
| <i>G. g. gorilla</i> | 9751   | Bulera     | - | - | GAGP      | unphased |          | unphased |          | unphased |          |
| <i>G. g. gorilla</i> | 9752   | Suzie      | - | - | GAGP      | unphased |          | unphased |          | unphased |          |
| <i>G. g. gorilla</i> | 9753   | Kokomo     | - | - | GAGP      | unphased |          | unphased |          | unphased |          |
| <i>G. g. gorilla</i> | A930   | Sandra     | F | - | GAGP      | unphased |          | unphased |          | unphased |          |
| <i>G. g. gorilla</i> | A931   | Banjo      | F | - | GAGP      | unphased |          | unphased |          | unphased |          |
| <i>G. g. gorilla</i> | A932   | Mimi       | F | - | GAGP      | unphased |          | unphased |          | unphased |          |
| <i>G. g. gorilla</i> | A933   | Dian       | F | - | GAGP      | unphased |          | unphased |          | unphased |          |
| <i>G. g. gorilla</i> | A934   | Delphi     | F | - | GAGP      | unphased |          | unphased |          | unphased |          |
| <i>G. g. gorilla</i> | A936   | Coco       | F | - | GAGP      | unphased |          | unphased |          | unphased |          |
| <i>G. g. gorilla</i> | A937   | Kolo       | F | - | GAGP      | unphased |          | unphased |          | unphased |          |
| <i>G. g. gorilla</i> | A962   | Amani      | F | - | GAGP      | unphased |          | unphased |          | unphased |          |
| <i>G. g. gorilla</i> | B642   | Akiba Beri | F | - | GAGP      | unphased |          | unphased |          | unphased |          |
| <i>G. g. gorilla</i> | B643   | Choomba    | F | - | GAGP      | unphased |          | unphased |          | unphased |          |
| <i>G. g. gorilla</i> | B644   | Paki       | F | - | GAGP      | unphased |          | unphased |          | unphased |          |
| <i>G. g. gorilla</i> | B647   | Anthal     | F | - | GAGP      | unphased |          | unphased |          | unphased |          |
| <i>G. g. gorilla</i> | B650   | Katie      | F | - | GAGP      | unphased |          | unphased |          | unphased |          |
| <i>G. g. gorilla</i> | KB3782 | Vila       | F | - | GAGP      | unphased |          | unphased |          | unphased |          |
| <i>G. g. gorilla</i> | KB3784 | Dolly      | F | - | GAGP      | unphased |          | unphased |          | unphased |          |
| <i>G. g. gorilla</i> | KB4986 | Katie      | F | - | GAGP      | unphased |          | unphased |          | unphased |          |
| <i>G. g. gorilla</i> | KB5792 | Carolyn    | F | - | GAGP      | unphased |          | unphased |          | unphased |          |
| <i>G. g. gorilla</i> | KB5852 | Helen      | F | - | GAGP      | unphased |          | unphased |          | unphased |          |
| <i>G. g. gorilla</i> | KB6039 | Oko        | F | - | GAGP      | unphased |          | unphased |          | unphased |          |
| <i>G. g. gorilla</i> | KB7973 | Porta      | F | - | GAGP      | unphased |          | unphased |          | unphased |          |
| <i>G. g. gorilla</i> | X00108 | Abe        | M | - | GAGP      | unphased |          | unphased |          | unphased |          |
| <i>G. g. gorilla</i> | X00109 | Tzambo     | M | - | GAGP      | unphased |          | unphased |          | unphased |          |
| <i>G. g. dielhi</i>  | B646   | Nyango     | F | - | GAGP      | unphased |          | unphased |          | unphased |          |

***Gorilla beringei* species**

|                      |      |          |   |   |      |          |  |          |  |          |  |
|----------------------|------|----------|---|---|------|----------|--|----------|--|----------|--|
| <i>G. b. graueri</i> | 9732 | Mkubwa   | M | - | GAGP | unphased |  | unphased |  | unphased |  |
| <i>G. b. graueri</i> | A929 | Kaisi    | M | - | GAGP | unphased |  | unphased |  | unphased |  |
| <i>G. b. graueri</i> | -    | Victoria | F | - | GAGP | unphased |  | unphased |  | unphased |  |

**Pongo species**

|                          |        |                |   |   |           |          |          |          |          |          |          |
|--------------------------|--------|----------------|---|---|-----------|----------|----------|----------|----------|----------|----------|
| <i>Pongo</i> (undefined) | -      | ORANG          | M | - | CARTA     | unphased | -        | unphased | -        | unphased | MK245452 |
| <i>P. abelii</i>         | 133060 | Budi           | M | - | Basel zoo | unphased | MK245141 | unphased | MK245299 | unphased | MK245453 |
| <i>P. abelii</i>         | 123057 | Vendel         | M | - | Basel zoo | unphased | MK245142 | unphased | MK245300 | unphased | MK245454 |
| <i>P. abelii</i>         | 123058 | Revital        | F | - | Basel zoo | unphased | MK245143 | unphased | MK245301 | unphased | MK245455 |
| <i>P. abelii</i>         | 820344 | Patpat/Schubbi | M | - | Basel zoo | unphased | MK245144 | unphased | MK245302 | unphased | MK245456 |
| <i>P. abelii</i>         | 920353 | Farida         | F | - | Basel zoo | unphased | MK245145 | unphased | MK245303 | unphased | MK245457 |
| <i>P. abelii</i>         | 760341 | Sexta          | F | - | Basel zoo | unphased | MK245146 | unphased | MK245304 | unphased | MK245458 |
| <i>P. abelii</i>         | 620332 | Kasih          | F | - | Basel zoo | unphased | MK245147 | unphased | MK245305 | unphased | MK245459 |
| <i>P. abelii</i>         | A947   | Elsi           | F | - | GAGP      | unphased |          | unphased |          | unphased |          |
| <i>P. abelii</i>         | A948   | Kiki           | F | - | GAGP      | unphased |          | unphased |          | unphased |          |
| <i>P. abelii</i>         | A949   | Dunja          | F | - | GAGP      | unphased |          | unphased |          | unphased |          |
| <i>P. abelii</i>         | A950   | Babu           | F | - | GAGP      | unphased |          | unphased |          | unphased |          |
| <i>P. abelii</i>         | A952   | Buschi         | M | - | GAGP      | unphased |          | unphased |          | unphased |          |
| <i>P. pygmaeus</i>       | A939   | Nonja          | F | - | GAGP      | unphased |          | unphased |          | unphased |          |
| <i>P. pygmaeus</i>       | A940   | Temmy          | F | - | GAGP      | unphased |          | unphased |          | unphased |          |
| <i>P. pygmaeus</i>       | A941   | Sari           | F | - | GAGP      | unphased |          | unphased |          | unphased |          |
| <i>P. pygmaeus</i>       | A943   | Tilda          | F | - | GAGP      | unphased |          | unphased |          | unphased |          |
| <i>P. pygmaeus</i>       | A944   | Napoleon       | M | - | GAGP      | unphased |          | unphased |          | unphased |          |

<sup>1</sup> Empty table entry (-) because information was unavailable; for column Origin, empty table entry can be due to unavailable information or if individual was born in captivity.

<sup>2</sup> CARTA : Center for Academic Research and Training in Anthropogeny; BPRC : Biomedical Primate Research Center; Basel zoo : Zoologischer Garten Basel AG, Switzerland; GAGP : Great Ape Genome Project.

<sup>3</sup> Genotypes deduced from relatives are underlined; genotypes that could not be unambiguously inferred are indicated as not defined (n.d.); only genotypes of the *Pan* genus could be phased with confidence (see text).

<sup>4</sup> Only for genotypes from the CARTA, BPRC and Basel zoo collections, generated through Sanger sequencing in this study.
