# Supplementary material
Source: publisher figshare collection journal article supplement (https://gsajournals.figshare.com/articles/dataset/_/7928192)
Supplement: Supplementary file 7 [file 2]

**Supplementary Table S13.** Nucleotide diversity of the three *NAT* gene paralogs in gorillas and orangutans.

|                                                   | Gorillas                   |                         | Orangutans                  |                       |
|---------------------------------------------------|----------------------------|-------------------------|-----------------------------|-----------------------|
|                                                   | <i>Gorilla gorilla</i>     | <i>Gorilla beringei</i> | <i>Pongo abelii</i>         | <i>Pongo pygmaeus</i> |
| <b><i>NAT1</i></b>                                |                            |                         |                             |                       |
| Total (2N chromosomes)                            | 66                         | 6                       | 24                          | 10                    |
| Number of used positions <sup>1</sup>             | 903                        | 891                     | 903                         | 902                   |
| Number of segregating sites ( <i>S</i> )          | 3                          | 2                       | 15                          | 3                     |
| Nucleotide diversity ( $\pi$ ) x 10 <sup>-3</sup> | 0.61                       | 0.82                    | 3.94                        | 1.36                  |
| <b><i>NAT2</i></b>                                |                            |                         |                             |                       |
| Total (2N chromosomes)                            | 64                         | 6                       | 24                          | 10                    |
| Number of used positions <sup>1</sup>             | 1'116                      | 1'083                   | 1'115                       | 1'114                 |
| Number of segregating sites ( <i>S</i> )          | 12 (+1 InDel) <sup>2</sup> | 1                       | 8                           | 7                     |
| Nucleotide diversity ( $\pi$ ) x 10 <sup>-3</sup> | 1.72                       | 0.31                    | 1.65                        | 1.40                  |
| <b><i>NATP</i></b>                                |                            |                         |                             |                       |
| Total (2N chromosomes)                            | 64                         | 6                       | 26                          | 10                    |
| Number of used positions <sup>1</sup>             | 1'008                      | 950                     | 1'002                       | 953                   |
| Number of segregating sites ( <i>S</i> )          | 13                         | 0                       | 15 (+ 1 InDel) <sup>2</sup> | 7                     |
| Nucleotide diversity ( $\pi$ ) x 10 <sup>-3</sup> | 2.77                       | 0                       | 3.76                        | 2.29                  |

<sup>1</sup> Number of successfully sequenced positions in common between the GAGP data and our Sanger sequencing results for *G. gorilla* and *P. pygmaeus* (only GAGP data available for *G. beringei* and *P. abelii*).

<sup>2</sup> Insertions and deletions (InDels) were not considered in the computation of nucleotide diversity.
