# Supplementary material
Source: publisher figshare collection journal article supplement (https://gsajournals.figshare.com/articles/dataset/_/7928192)
Supplement: Supplementary file 8 [file 2]

**Supplementary Table S9.** Haplotype counts of the three *NAT* gene paralogs in the total samples of the genus *Pan*.

| Samples <sup>1</sup>           | <i>P. t. verus</i> |           |                 |      | <i>P. t. ellioti</i> | <i>P. t. troglodytes</i> | <i>P. t. schweinfurthii</i> | Hybrid | <i>P. paniscus</i> |
|--------------------------------|--------------------|-----------|-----------------|------|----------------------|--------------------------|-----------------------------|--------|--------------------|
|                                | CARTA              | Basel zoo | BPRC            | GAGP |                      |                          |                             |        |                    |
| <b><i>Pan NAT1</i></b>         |                    |           |                 |      |                      |                          |                             |        |                    |
| <i>NAT1*1</i>                  | 41                 | 4         | 64              | 5    | 13                   | 7                        | 8                           | 2      | 7                  |
| <i>NAT1*2</i>                  | 4                  |           | 3               |      | 1                    |                          |                             |        |                    |
| <i>NAT1*3</i>                  | 3                  |           |                 |      |                      | 1                        | 1                           |        |                    |
| <i>NAT1*4</i>                  | 3                  |           | 14              | 1    |                      |                          |                             |        |                    |
| <i>NAT1*5</i>                  | 1                  |           |                 |      |                      |                          |                             |        |                    |
| <i>NAT1*6</i>                  |                    |           | 1               |      |                      |                          |                             |        | 15                 |
| <i>NAT1*7</i>                  |                    |           |                 |      | 2                    |                          |                             |        |                    |
| <i>NAT1*8</i>                  |                    |           |                 |      |                      | 1                        |                             |        |                    |
| <i>NAT1*9</i>                  |                    |           |                 |      |                      |                          | 1                           |        |                    |
| <i>NAT1*10</i>                 |                    |           |                 |      | 4                    | 1                        | 1                           |        |                    |
| <i>NAT1*11</i>                 |                    |           |                 |      |                      |                          | 1                           |        |                    |
| <i>NAT1*12</i>                 |                    |           |                 |      |                      |                          |                             |        | 6                  |
| Total sample size <sup>2</sup> | 52                 | 4         | 82 <sup>3</sup> | 6    | 20                   | 10                       | 12                          | 2      | 28                 |
| <b><i>Pan NAT2</i></b>         |                    |           |                 |      |                      |                          |                             |        |                    |
| <i>NAT2*1</i>                  | 46                 | 4         | 72              | 5    | 1                    | 1                        |                             | 1      |                    |
| <i>NAT2*2</i>                  | 3                  |           | 8               | 1    |                      |                          |                             |        |                    |
| <i>NAT2*3</i>                  |                    |           | 1               |      |                      |                          |                             |        |                    |
| <i>NAT2*4</i>                  | 3                  |           |                 |      | 2                    | 8                        | 11                          | 1      |                    |
| <i>NAT2*5</i>                  |                    |           | 1               |      |                      |                          |                             |        |                    |
| <i>NAT2*6</i>                  |                    |           |                 |      | 17                   | 1                        |                             |        |                    |
| <i>NAT2*7</i>                  |                    |           |                 |      |                      |                          |                             |        | 25                 |
| <i>NAT2*8</i>                  |                    |           |                 |      |                      |                          |                             |        | 1                  |
| <i>NAT2*9</i>                  |                    |           |                 |      |                      |                          |                             |        | 2                  |
| <i>NAT2*10</i>                 |                    |           |                 |      |                      |                          | 1                           |        |                    |
| Total sample size <sup>2</sup> | 52                 | 4         | 82 <sup>3</sup> | 6    | 20                   | 10                       | 12                          | 2      | 28                 |

**Pan NATP**

|                                |    |   |                 |   |    |    |    |   |    |
|--------------------------------|----|---|-----------------|---|----|----|----|---|----|
| NATP*1                         | 13 | 2 | 37              |   |    | 1  |    |   |    |
| NATP*2                         | 21 | 2 | 33              | 6 | 8  | 1  | 7  | 1 |    |
| NATP*3                         |    |   |                 |   |    | 2  |    |   |    |
| NATP*4                         |    |   | 8               |   |    |    |    |   |    |
| NATP*5                         |    |   | 4               |   |    |    |    |   |    |
| NATP*6                         | 2  |   |                 |   |    |    |    |   |    |
| NATP*7                         | 13 |   | 6               |   |    |    |    |   |    |
| NATP*8                         | 3  |   |                 |   | 5  | 2  | 1  |   |    |
| NATP*9                         |    |   |                 |   |    | 3  |    |   |    |
| NATP*10                        |    |   |                 |   |    |    | 1  |   |    |
| NATP*11                        |    |   |                 |   | 2  |    | 2  |   |    |
| NATP*12                        |    |   |                 |   | 1  |    |    |   |    |
| NATP*13                        |    |   |                 |   |    |    |    | 1 |    |
| NATP*14                        |    |   |                 |   | 1  |    |    |   |    |
| NATP*15                        |    |   |                 |   | 3  |    |    |   |    |
| NATP*16                        |    |   |                 |   |    | 1  |    |   |    |
| NATP*17                        |    |   |                 |   |    |    | 1  |   |    |
| NATP*18                        |    |   |                 |   |    |    |    |   | 27 |
| NATP*19                        |    |   |                 |   |    |    |    |   | 1  |
| Total sample size <sup>2</sup> | 52 | 4 | 88 <sup>4</sup> | 6 | 20 | 10 | 12 | 2 | 28 |

<sup>1</sup> CARTA : includes the sequences from all 26 DNA samples from the CARTA research center (including those of related individuals); BPRC : includes the sequences from all 40 individuals from the Biomedical Primate Research Centre (BPRC) colony, plus those deduced genotypes from descendants (see footnotes 3 and 4) ; GAGP : includes all *P.t. verus* genotypes retrieved from the Great Ape Genome Project (GAGP), except that of Boscoe already included in San Diego (CARTA); the samples of *P. t. troglodytes*, *P. t. schweinfurthii*, and *P. paniscus* include genotypes retrieved from the GAGP and one DNA sample each that was Sanger sequenced in this study (of which one *P. t. schweinfurthii* genotype, Harriet, that is common in the GAGP and San Diego datasets), whereas the *P. t. ellioti* sample only includes genotypes retrieved from the GAGP; Hybrid : hybrid *P. t. troglodytes* and *P. t. verus* individual (see text).

<sup>2</sup> Total sample size in number of chromosomes (2n).

<sup>3</sup> Includes the genotype of Izaak that has been deduced from his children's genotypes (Bram, Gerda and Yoran); see Supplementary Figure S1A.

<sup>4</sup> Includes the genotypes of Izaak, Gerrit, Tasja and Marga, all deduced from their children's genotypes, see Supplementary Figure S1A.
