# Supplementary material
Source: publisher figshare collection journal article supplement (https://gsajournals.figshare.com/articles/dataset/_/7928192)
Supplement: Supplementary file 9 [file 2]

|       |          |      |     |   |   |   |   |   |   |   |   |   |   |
|-------|----------|------|-----|---|---|---|---|---|---|---|---|---|---|
| * 116 | 18258551 | 1038 | T   | T | T | T | T | T | T | T | T | C | C |
| 117   | 18258598 | 1085 | G/A | G | G | G | G | G | G | G | G | G | G |

<sup>1</sup> Human polymorphisms are those recorded by the consensus gene nomenclature of human *NAT* alleles (<http://nat.mbg.duth.gr/>), complemented with haplotype data from 1000Genomes Phase 1 (The Genomes Project Consortium 2012), (Sabbagh et al. 2008), (Patin et al. 2006a), (Mortensen et al. 2011) and (Podgorna et al. 2015). Human positions not recorded as polymorphic but associated with a SNP identifier are reported with a highest population MAF < 0.01 in Ensembl (Yates et al. 2016) ([http://www.ensembl.org/Homo\\_sapiens/Info/Index](http://www.ensembl.org/Homo_sapiens/Info/Index)).

<sup>2</sup> Western, Niger-Cameroon, Eastern and Central chimpanzees are *Pan troglodytes verus*, *P. t. ellioti*, *P. t. schweinfurthii* and *P. t. troglodytes*, respectively. Polymorphism recording is based on the individuals of the present study (Supplementary Figure S1) and the chimpanzees of Prado-Martinez et al. (2013) cross-checked with the *P. t. verus* assembly reference sequence (panTro4, February 2011). For Eastern chimpanzees (*P. t. schweinfurthii*), no successful *NAT2* Sanger sequencing of the single DNA sample available in this study (CHarriet) was achieved, so that *NAT2* polymorphism recording for this individual is based solely on the NGS sequence from Prado-Martinez et al. (2013).

<sup>3</sup> Based on the *Pan paniscus* individual of this study (Bonobo), the bonobos of Prado-Martinez et al. (2013) and the *Pan paniscus* draft assembly reference sequence (PanPan1, May 2012).

<sup>4</sup> Based on the individuals of this study, the gorillas of Prado-Martinez et al. (2013) and the *Gorilla gorilla gorilla* draft assembly reference sequence (gorGor4, December 2014).

<sup>5</sup> Based on the individuals of this study, the orangutans of Prado-Martinez et al. (2013) and the *Pongo pygmaeus abelii* draft assembly reference sequence (ponAbe2, July 2007).

<sup>6</sup> At this position (18'257'858), a fixed non-synonymous mutation (A) differentiates the *Pan* genus from the other hominids. Among the latter, a synonymous C/T polymorphism is observed in humans and gorillas, whereas a T is observed in the orangutans.

<sup>7</sup> At this position (18'258'316), a synonymous A/G polymorphism is observed in humans, whereas all other hominids are apparently fixed on A; an A is also observed in the Neanderthal sequences; in Denisova there seems to be an inconsistency at this position between the high-coverage sequence reads of the Denisova genome in the UCSC Genome Browser (reporting A) and the ancient genome browser from the Max Planck Institute for Evolutionary Anthropology, which apparently reports G (see Supplementary Table S8).

<sup>8</sup> At this position (18'258'351), a non-synonymous G/A polymorphism is observed in humans, and a non-synonymous mutation (C) differentiates the orangutans from all other hominids (G).

<sup>9</sup> At this position (18'258'407), immediately downstream the coding exon, we hypothesize that a C insertion (C/CC) polymorphism could be present in gorillas. The four gorillas Sanger sequenced in this study have the C insertion and so does the gorGor3 reference sequence (gorGor3, May 2011). However, the newer gorGor4 reference sequence does not have this insertion, and it is not reported, either, in the gorilla NGS sequences of the GAGP from Prado-Martinez et al. (2013).

## References

Mortensen HM, Froment A, Lema G, Bodo JM, Ibrahim M, Nyambo TB, Omar SA, and Tishkoff SA. 2011. Characterization of genetic variation and natural selection at the arylamine N-acetyltransferase genes in global human populations. *Pharmacogenomics* 12(11):1545-1558.

- Patin E, Barreiro LB, Sabeti PC, Austerlitz F, Luca F, Sajantila A, Behar DM, Semino O, Sakuntabhai A, Guiso N et al. . 2006. Deciphering the ancient and complex evolutionary history of human arylamine N-acetyltransferase genes. *American journal of human genetics* 78(3):423-436.
- Podgorna E, Diallo I, Vangenot C, Sanchez-Mazas A, Sabbagh A, Cerny V, and Poloni ES. 2015. Variation in NAT2 acetylation phenotypes is associated with differences in food-producing subsistence modes and ecoregions in Africa. *BMC Evol Biol* 15:263.
- Prado-Martinez J, Sudmant PH, Kidd JM, Li H, Kelley JL, Lorente-Galdos B, Veeramah KR, Woerner AE, O'Connor TD, Santpere G et al. . 2013. Great ape genetic diversity and population history. *Nature* 499(7459):471-475.
- Sabbagh A, Langaney A, Darlu P, Gerard N, Krishnamoorthy R, and Poloni ES. 2008. Worldwide distribution of NAT2 diversity: implications for NAT2 evolutionary history. *BMC Genet* 9:21.
- The Genomes Project C. 2012. An integrated map of genetic variation from 1,092 human genomes. *Nature* 491:56.
- Yates A, Akanni W, Amode MR, Barrell D, Billis K, Carvalho-Silva D, Cummins C, Clapham P, Fitzgerald S, Gil L et al. . 2016. Ensembl 2016. *Nucleic Acids Res* 44(D1):D710-D716.
