# Supplementary material
Source: publisher figshare collection journal article supplement (https://gsajournals.figshare.com/articles/dataset/_/7928192)
Supplement: Supplementary file 10 [file 2]

**Supplementary Table S16.** Predictions of the effect of substitutions between inferred hominid ancestral *NAT1* and *NAT2* coding sequences and *Pan* basal and human reference haplotypes according to PolyPhen, SIFT and PANTHER cSNP Scoring.

A description of the scores and predictions returned by each of the three online software tools is provided in Supplementary File S1. Inferred ancestral haplotypes are those reconstructed for the theoretical hominid common ancestor at the center of the *NAT1* and *NAT2* networks (Supplementary Figures S2 and S3 for, respectively, *NAT1* and *NAT2*). For *NAT1*, two ancestral haplotypes were considered: ancestral\_1 bearing C at position 583, and ancestral\_2, bearing A at position 583.

| Haplotypes                                         | cDNA  | protein | PolyPhen           |                         | SIFT               |                         | PANTHER cSNP Scoring                           |                         |
|----------------------------------------------------|-------|---------|--------------------|-------------------------|--------------------|-------------------------|------------------------------------------------|-------------------------|
|                                                    |       |         | Score <sup>1</sup> | Prediction <sup>2</sup> | Score <sup>3</sup> | Prediction <sup>4</sup> | PSEP <sup>5</sup>                              | Prediction <sup>6</sup> |
| <b><i>NAT1</i></b>                                 |       |         |                    |                         |                    |                         |                                                |                         |
| <i>NAT1</i> ancestral_1 to <i>Pan troglodytes</i>  |       |         |                    |                         |                    |                         |                                                |                         |
|                                                    | C529A | H177N   | 0 (1.00-0.00)      | B                       | 1.00 (3.07, 81)    | T                       | Not scored (invalid substitution) <sup>7</sup> |                         |
| <i>NAT1</i> ancestral_1 to <i>NAT1</i> ancestral_2 |       |         |                    |                         |                    |                         |                                                |                         |
|                                                    | C583A | Q195K   | 0.001 (0.99-0.15)  | B                       | 0.06 (3.07, 81)    | T                       | 30                                             | B                       |
| <i>NAT1</i> ancestral_2 to <i>NAT1</i> ancestral_1 |       |         |                    |                         |                    |                         |                                                |                         |
|                                                    | A583C | K195Q   | 0 (1.00-0.00)      | B                       | 0.17 (3.07, 81)    | T                       | Not scored (invalid substitution) <sup>7</sup> |                         |
| <i>NAT1</i> ancestral_2 to <i>Homo sapiens</i>     |       |         |                    |                         |                    |                         |                                                |                         |
|                                                    | A138T | E46D    | 0.177 (0.92-0.87)  | B                       | 0.01 (3.07, 81)    | A                       | 908                                            | PRD                     |
|                                                    | G826C | E276Q   | 0.046 (0.94-0.83)  | B                       | 0.24 (3.07, 78)    | T                       | 908                                            | PRD                     |
| <b><i>NAT2</i></b>                                 |       |         |                    |                         |                    |                         |                                                |                         |
| <i>NAT2</i> ancestral to <i>Pan troglodytes</i>    |       |         |                    |                         |                    |                         |                                                |                         |
|                                                    | T293C | V98A    | 0 (1.00-0.00)      | B                       | 0.91 (3.07, 50)    | T                       | 6                                              | B                       |
|                                                    | T664C | F222L   | 0.009 (0.96-0.77)  | B                       | 0.46 (3.07, 51)    | T                       | 176                                            | B                       |
|                                                    | C345A | D115E   | 0.001 (0.99-0.15)  | B                       | 0.2 (3.07, 50)     | T                       | 6                                              | B                       |
|                                                    | G443C | C148S   | 0 (1.00-0.00)      | B                       | 0.34 (3.07, 51)    | T                       | 6                                              | B                       |
|                                                    | A595G | I199V   | 0.019 (0.95-0.80)  | B                       | 0.45 (3.07, 51)    | T                       | 6                                              | B                       |
| <i>NAT2</i> ancestral to <i>Homo sapiens</i>       |       |         |                    |                         |                    |                         |                                                |                         |
|                                                    | C451T | R151C   | 0.980 (0.75-0.96)  | PRD                     | 0 (3.07, 51)       | A                       | Not scored (invalid substitution) <sup>7</sup> |                         |
|                                                    | C511A | P171T   | 0.188 (0.92- 0.87) | B                       | 0.27 (3.07, 51)    | T                       | Not scored (invalid substitution) <sup>7</sup> |                         |
|                                                    | C573A | F191L   | 0 (1.00-0.00)      | B                       | 0.47 (3.07, 51)    | T                       | Not scored (invalid substitution) <sup>7</sup> |                         |
|                                                    | G834T | K278N   | 1.00 (0.00-1.00)   | PRD                     | 0 (3.08, 49)       | A                       | Not scored (invalid substitution) <sup>7</sup> |                         |

<sup>1</sup> PolyPhen score : probability that a substitution is damaging; sensibility and specificity in brackets.

<sup>2</sup> PolyPhen prediction : “benign” (B), “possibly damaging” (POD), “probably damaging” (PRD).

<sup>3</sup> SIFT score : probability that a substitution is tolerated; median sequence information and number of sequences used for the prediction in brackets.

<sup>4</sup> SIFT prediction : T: “tolerated” (T), A: “affect protein function” (A).

<sup>5</sup> PANTHER cSNP Scoring PSEP (position-specific evolutionary preservation) : length of time (in millions of years) of preservation of a position.

<sup>6</sup> PANTHER cSNP Scoring prediction : "probably damaging" (PRD), "possibly damaging" (POD), "probably benign" (B).

<sup>7</sup> PANTHER cSNP Scoring returns the message “Not scored (invalid substitution)” when the input reference amino acid (e.g. H in H177N) does not match the amino acid at that site in the best-match sequence in the PANTHER library, and is likely to be a partial mismatch between the user-input sequence and the best match in PANTHER.
