# Supplementary material
Source: publisher figshare collection journal article supplement (https://gsajournals.figshare.com/articles/dataset/_/7928192)
Supplement: Supplementary file 11 [file 2]

**Supplementary Table S3.** Polymorphism and divergence in hominids at homologous positions in the 903 bp sequence including the 870 bp *NAT1* coding exon.

The screened sequence spans from 18'079'545 to 18'080'447 on chromosome 8 in the human reference sequence GRCh37/hg19. Positions upstream or downstream the *NAT1* coding exon are reported in italic font. Non-synonymous mutations are shown in bold type. The 21 substitutions corresponding to inter-species divergence (between two species at least) are highlighted by stars to the left part of the table. Polymorphisms shared between species or sub-species are highlighted in blue font. (N) indicates that undefined positions were also observed in some individuals. Variants also recorded in sequenced ancient genomes of hominins (Denisova, Neanderthal or 45'000 years old *Homo sapiens* from Ust'-Ishim) are boxed (see Supplementary Table S8).

|      | Position                 |            |                    | Common chimpanzee <sup>2</sup> |            |                  |            |            |                     | Gorilla <sup>4</sup>   |                         | Orangutan <sup>5</sup> |                       |
|------|--------------------------|------------|--------------------|--------------------------------|------------|------------------|------------|------------|---------------------|------------------------|-------------------------|------------------------|-----------------------|
|      | human reference sequence | human cds  | SNP ID in Ensembl  | Human <sup>1</sup>             | Western    | Nigeria-Cameroon | Eastern    | Central    | Bonobo <sup>3</sup> | <i>Gorilla gorilla</i> | <i>Gorilla beringei</i> | <i>Pongo abelii</i>    | <i>Pongo pygmaeus</i> |
| * 1  | <i>18079548</i>          | -9         |                    | <i>T</i>                       | <i>C</i>   | <i>C</i>         | <i>C</i>   | <i>C</i>   | <i>C</i>            | <i>T</i>               | <i>T</i>                | <i>T</i>               | <i>T</i>              |
| 2    | 18079577                 | 21         | rs4986992          | T/G                            | T          | T                | T          | T          | T                   | T                      | T                       | T                      | T                     |
| * 3  | 18079595                 | 39         |                    | G                              | A          | A                | A          | A          | A                   | G                      | G                       | G                      | G                     |
| 4    | 18079631                 | 75         | rs201603160        | T/C                            | T          | T                | T          | T          | T                   | T                      | T                       | T                      | T                     |
| 5    | <b>18079632</b>          | <b>76</b>  |                    | <b>G</b>                       | <b>G/A</b> | <b>G/A</b>       | <b>G/A</b> | <b>G/A</b> | <b>G</b>            | <b>G</b>               | <b>G</b>                | <b>G</b>               | <b>G</b>              |
| * 6  | 18079643                 | 87         |                    | A                              | A          | A                | A          | A          | A                   | A                      | A                       | G                      | G                     |
| 7    | <b>18079653</b>          | <b>97</b>  | <b>rs56318881</b>  | <b>C/T</b>                     | <b>C</b>   | <b>C</b>         | <b>C</b>   | <b>C</b>   | <b>C</b>            | <b>C</b>               | <b>C</b>                | <b>C</b>               | <b>C</b>              |
| * 8  | 18079664                 | 108        |                    | C                              | C          | C                | C          | C          | C                   | C                      | C                       | A                      | A                     |
| 9    | 18079688                 | 132        |                    | T                              | T          | T                | T          | T          | T                   | T                      | T                       | C                      | C/T (N)               |
| 10   | <b>18079689</b>          | <b>133</b> | <b>rs181298696</b> | <b>G/T</b>                     | <b>G</b>   | <b>G</b>         | <b>G</b>   | <b>G</b>   | <b>G</b>            | <b>G</b>               | <b>G</b>                | <b>G/A</b>             | <b>G</b>              |
| * 11 | <b>18079694</b>          | <b>138</b> |                    | <b>T</b>                       | <b>A</b>   | <b>A</b>         | <b>A</b>   | <b>A</b>   | <b>A</b>            | <b>A</b>               | <b>A</b>                | <b>A</b>               | <b>A</b>              |
| 12   | <i>18079703</i>          | <i>147</i> |                    | <i>C</i>                       | <i>C/T</i> | <i>C/T</i>       | <i>C/T</i> | <i>C/T</i> | <i>C</i>            | <i>C</i>               | <i>C</i>                | <i>C</i>               | <i>C</i>              |
| 13   | 18079737                 | 181        |                    | A                              | A          | A                | A          | A          | A                   | A                      | A/C(N)                  | A                      | A                     |
| 14   | <b>18079746</b>          | <b>190</b> | <b>rs56379106</b>  | <b>C/T</b>                     | <b>C</b>   | <b>C</b>         | <b>C</b>   | <b>C</b>   | <b>C</b>            | <b>C</b>               | <b>C</b>                | <b>C</b>               | <b>C</b>              |
| 15   | <b>18079757</b>          | <b>201</b> | <b>rs200617057</b> | <b>G/C</b>                     | <b>G</b>   | <b>G</b>         | <b>G</b>   | <b>G</b>   | <b>G</b>            | <b>G</b>               | <b>G</b>                | <b>G</b>               | <b>G</b>              |
| 16   | 18079775                 | 219        | rs765390690        | T                              | T          | T                | T          | T          | T                   | T/C(N)                 | T                       | T                      | T                     |
| 17   | 18079793                 | 237        | rs751824544        | G/C                            | G          | G                | G          | G          | G                   | G                      | G                       | G                      | G                     |
| 18   | <b>18079797</b>          | <b>241</b> |                    | <b>A</b>                       | <b>A</b>   | <b>A</b>         | <b>A</b>   | <b>A</b>   | <b>A</b>            | <b>A</b>               | <b>A</b>                | <b>T/A</b>             | <b>T</b>              |
| * 19 | <b>18079809</b>          | <b>253</b> |                    | <b>G</b>                       | <b>G</b>   | <b>G</b>         | <b>G</b>   | <b>G</b>   | <b>G</b>            | <b>C</b>               | <b>C</b>                | <b>G</b>               | <b>G</b>              |
| * 20 | 18079817                 | 261        | rs368205381        | G                              | A          | A                | A          | A          | A                   | G                      | G                       | G                      | G                     |

|                 |                   |          |     |                                   |     |     |   |     |     |     |        |     |        |        |
|-----------------|-------------------|----------|-----|-----------------------------------|-----|-----|---|-----|-----|-----|--------|-----|--------|--------|
| *               | 21                | 18079821 | 265 |                                   | T   | T   | T | T   | T   | T   | C      | C   | T      | T      |
| *               | 22                | 18079829 | 273 |                                   | G   | T   | T | T   | T   | T   | G      | G   | G      | G      |
|                 | 23                | 18079859 | 303 |                                   | C   | C   | C | C   | C   | C/T | C      | C   | C      | C      |
|                 | 24                | 18079883 | 327 |                                   | C   | C   | C | C   | C   | C   | C      | C   | T/C    | T      |
|                 | 25                | 18079892 | 336 |                                   | G   | G   | G | G   | G   | G   | G      | G   | G/C    | G/C(N) |
|                 | 26                | 18079897 | 341 | rs145975713                       | T   | T   | T | T   | T/C | T   | T      | T   | T      | T      |
|                 | 27                | 18079898 | 342 | rs371752075                       | T/C | T   | T | T   | T   | T   | T      | T   | T      | T      |
|                 | 28                | 18079901 | 345 | rs768399724                       | T   | T   | T | T   | T   | T   | T      | T   | C/T(N) | C      |
|                 | 29                | 18079902 | 346 |                                   | G   | G   | G | G   | G   | G   | G      | G   | G/A(N) | G      |
| 30 <sup>6</sup> | 18079906-18079907 | 350-351  |     | rs72554606                        | G/C | G   | G | G   | G   | G   | G      | G   | G      | G      |
|                 | 31                | 18079924 | 368 | rs771202638                       | C   | C   | C | C   | C   | C   | C      | C   | C      | C      |
|                 | 32                | 18079925 | 369 |                                   | T   | T/C | T | T   | T   | T/C | T      | T   | T      | T      |
|                 | 33                | 18079943 | 387 |                                   | C   | C   | C | C   | C   | C   | C/T(N) | C   | C      | C      |
| *               | 34                | 18079946 | 390 | rs376036465                       | G   | G   | G | G   | G   | G   | G      | G   | A      | A      |
|                 | 35                | 18079958 | 402 | rs146727732                       | T/C | T   | T | T   | T   | T   | T      | T   | T      | T      |
|                 | 36                | 18079976 | 420 |                                   | G   | G   | G | G   | G   | G   | G      | G   | G/C    | G      |
| *               | 37                | 18079994 | 438 |                                   | G   | G   | G | G   | G   | G   | T      | T   | G      | G      |
| *               | 38                | 18080000 | 444 |                                   | T   | T   | T | T   | T   | T   | T      | T   | C      | C      |
|                 | 39                | 18080001 | 445 | rs4987076                         | A/G | A   | A | A   | A   | A   | A/G(N) | A/G | A/G    | A/G    |
|                 | 40                | 18080007 | 451 | rs760970670                       | C   | C   | C | C   | C   | C   | T      | T   | C/T    | C      |
| *               | 41                | 18080009 | 453 |                                   | T   | T   | T | T   | T   | T   | T      | T   | C      | C      |
|                 | 42                | 18080014 | 458 | rs374226986                       | C   | C   | C | C/T | C   | C   | C      | C   | C      | C      |
|                 | 43                | 18080015 | 459 | rs4986990                         | G/A | G   | G | G   | G   | G   | G      | G   | G/A    | G      |
|                 | 44                | 18080024 | 468 | rs141809132                       | T/C | T   | T | T   | T   | T   | T      | T   | T      | T      |
| 45 <sup>7</sup> | 18080053-18080055 | 497-499  |     | rs72554608/rs56328478/rs745892749 | G/C | G   | G | G   | G   | G   | G      | G   | G      | G      |
|                 | 46                | 18080074 | 518 |                                   | A   | A   | A | A/C | A   | A   | A      | A   | A      | A      |
| *               | 47                | 18080085 | 529 |                                   | C   | A   | A | A   | A   | A   | C      | C   | A      | A      |
|                 | 48                | 18080089 | 533 |                                   | C   | C   | C | C   | C   | C   | C      | C   | G/C    | G      |
| *               | 49                | 18080099 | 543 |                                   | A   | G   | G | G   | G   | G   | A      | A   | A      | A      |
|                 | 50                | 18080107 | 551 |                                   | G   | G   | G | G   | G   | G   | G      | G   | G/A(N) | G      |

|      |          |     |             |     |     |     |     |     |   |       |       |     |   |
|------|----------|-----|-------------|-----|-----|-----|-----|-----|---|-------|-------|-----|---|
| 51   | 18080115 | 559 | rs5030839   | C/T | C   | C   | C   | C   | C | C     | C     | C   | C |
| 52   | 18080116 | 560 | rs4986782   | G/A | G   | G   | G   | G   | G | G     | G     | G   | G |
| 53   | 18080128 | 572 | rs141552883 | C/T | C   | C   | C   | C   | C | C     | C     | C   | C |
| * 54 | 18080139 | 583 |             | A   | C   | C   | C   | C   | C | G     | G     | G   | G |
| 55   | 18080153 | 597 |             | T   | T/G | T   | T   | T   | T | T     | T     | T   | T |
| 56   | 18080169 | 613 | rs72554609  | A/G | A   | A   | A   | A   | A | A     | A     | A   | A |
| 57   | 18080196 | 640 | rs4986783   | G/T | G   | G   | G   | G   | G | G     | G     | G   | G |
| 58   | 18080219 | 663 |             | A/G | A   | A   | A   | A   | A | A     | A     | A   | A |
| 58   | 18080247 | 691 | rs201916736 | G/T | G   | G   | G   | G   | G | G     | G     | G   | G |
| * 60 | 18080277 | 721 |             | C   | C   | C   | C   | C   | C | C     | C     | T   | T |
| 61   | 18080293 | 737 | rs201129487 | A/G | A   | A   | A   | A   | A | A     | A     | A   | A |
| 62   | 18080308 | 752 | rs56172717  | A/T | A   | A   | A   | A   | A | A     | A     | A   | A |
| 63   | 18080312 | 756 | rs112846752 | A/T | A   | A   | A   | A   | A | A     | A     | G   | G |
| 64   | 18080316 | 760 |             | G   | G   | G/C | G   | G   | G | G     | G     | G   | G |
| * 65 | 18080321 | 765 |             | C   | T   | T   | T   | T   | T | C     | C     | C   | C |
| * 66 | 18080332 | 776 |             | G   | G   | G   | G   | G   | G | G     | G     | A   | A |
| 67   | 18080333 | 777 | rs4986991   | T/C | T   | T   | T   | T   | T | T     | T     | T   | T |
| 68   | 18080336 | 780 |             | G   | G   | G   | G   | G   | G | G     | G     | G/T | G |
| 69   | 18080337 | 781 | rs72554610  | G/A | G   | G   | G   | G   | G | G     | G     | G   | G |
| 70   | 18080343 | 787 | rs72554611  | A/G | A   | A   | A   | A   | A | A (N) | A (N) | A   | A |
| 71   | 18080345 | 789 |             | A   | A/G | A   | A/G | A/G | A | A     | A     | A   | A |
| 72   | 18080363 | 807 | rs201670530 | T/C | T   | T   | T   | T   | T | T     | T     | T   | T |
| * 73 | 18080375 | 819 | rs746370481 | T   | A   | A   | A   | A   | A | T     | T     | T   | T |
| * 74 | 18080382 | 826 |             | C   | G   | G   | G   | G   | G | G     | G     | G   | G |
| 75   | 18080432 | 876 |             | T   | T   | T   | T   | T   | T | T     | T     | C/T | C |
| 76   | 18080440 | 884 | rs55793712  | A/G | A   | A   | A   | A   | A | A     | A     | A   | A |

<sup>1</sup> Human polymorphisms are those recorded by the consensus gene nomenclature of human *NAT* alleles (<http://nat.mbg.duth.gr/>), complemented with haplotype data from 1000Genomes Phase 1 (The Genomes Project Consortium 2012), (Patin et al. 2006a) and (Mortensen et al. 2011). Human positions not recorded as polymorphic but associated with a SNP identifier are reported with a highest population MAF < 0.01 in Ensembl (Yates et al. 2016) ([http://www.ensembl.org/Homo\\_sapiens/Info/Index](http://www.ensembl.org/Homo_sapiens/Info/Index)).

<sup>2</sup> Western, Niger-Cameroon, Eastern and Central chimpanzees are *Pan troglodytes verus*, *P. t. ellioti*, *P. t. schweinfurthii* and *P. t. troglodytes*, respectively. Polymorphism recording is based on the individuals of the present study (Supplementary Figure S1) and the chimpanzees of Prado-Martinez et al. (2013) cross-checked with the *P. t. verus* assembly reference sequence (panTro4, February 2011).

<sup>3</sup> Based on the individual of this study (Bonobo), the bonobos of Prado-Martinez et al. (2013) and the *Pan paniscus* draft assembly reference sequence (panPan1, May 2012).

<sup>4</sup> Based on the individuals of this study, the gorillas of Prado-Martinez et al. (2013) and the *Gorilla gorilla gorilla* draft assembly reference sequence (gorGor4, December 2014).

<sup>5</sup> Based on the individuals of this study, the orangutans of Prado-Martinez et al. (2013) and the *Pongo pygmaeus abelii* draft assembly reference sequence (ponAbe2, July 2007).

<sup>6</sup> Polymorphism (rs72554606) reported by the consensus gene nomenclature of human *NAT* alleles as occurring on haplotype *NAT1\*5*, on one of these two positions: 18'079'906 or 18'079'907.

<sup>7</sup> Polymorphism (rs72554608) reported in the consensus gene nomenclature of human *NAT* alleles as occurring also on haplotype *NAT1\*5*, on one of these three positions: 18'080'053, 18'080'054, or 18'080'055. Two additional SNP identifiers are reported in Ensembl (rs56328478 and rs745892749).

## References

- Mortensen HM, Froment A, Lema G, Bodo JM, Ibrahim M, Nyambo TB, Omar SA, and Tishkoff SA. 2011. Characterization of genetic variation and natural selection at the arylamine N-acetyltransferase genes in global human populations. *Pharmacogenomics* 12(11):1545-1558.
- Patin E, Barreiro LB, Sabeti PC, Austerlitz F, Luca F, Sajantila A, Behar DM, Semino O, Sakuntabhai A, Guiso N et al. . 2006. Deciphering the ancient and complex evolutionary history of human arylamine N-acetyltransferase genes. *American journal of human genetics* 78(3):423-436.
- Prado-Martinez J, Sudmant PH, Kidd JM, Li H, Kelley JL, Lorente-Galdos B, Veeramah KR, Woerner AE, O'Connor TD, Santpere G et al. . 2013. Great ape genetic diversity and population history. *Nature* 499(7459):471-475.
- The Genomes Project C. 2012. An integrated map of genetic variation from 1,092 human genomes. *Nature* 491:56.
- Yates A, Akanni W, Amode MR, Barrell D, Billis K, Carvalho-Silva D, Cummins C, Clapham P, Fitzgerald S, Gil L et al. . 2016. Ensembl 2016. *Nucleic Acids Res* 44(D1):D710-D716.
