# Supplementary material
Source: publisher figshare collection journal article supplement (https://gsajournals.figshare.com/articles/dataset/_/7928192)
Supplement: Supplementary file 12 [file 2]

**Supplementary Table S7.** Diversity of *NAT* genes in human populations and results of Hardy-Weinberg equilibrium tests.

| ID                            | Population                                                    | n <sup>1</sup> | k <sup>1</sup> | S <sup>1</sup> | h <sup>1</sup> | $\pi$ (x 10 <sup>-3</sup> ) <sup>1</sup> | Hardy-Weinberg equilibrium test <sup>2</sup> |                   |
|-------------------------------|---------------------------------------------------------------|----------------|----------------|----------------|----------------|------------------------------------------|----------------------------------------------|-------------------|
|                               |                                                               |                |                |                |                |                                          | H <sub>0</sub>                               | P-value HW        |
| <b><i>NAT1</i></b>            |                                                               |                |                |                |                |                                          |                                              |                   |
| <i>Sub-Saharan Africa</i>     |                                                               |                |                |                |                |                                          |                                              |                   |
| 2                             | Yoruba in Ibadan, Nigeria <sup>3</sup>                        | 88             | 3              | 3              | 0.034          | 0.063                                    | 0.034                                        | >0.999            |
| 4                             | Luhya in Webuye, Kenya <sup>3</sup>                           | 97             | 4              | 5              | 0.061          | 0.147                                    | 0.062                                        | >0.999            |
| 5                             | Maasai of Tanzania <sup>4</sup>                               | 16             | 3              | 4              | 0.123          | 0.277                                    | 0.125                                        | >0.999            |
| 6                             | Turu of Tanzania <sup>4</sup>                                 | 16             | 3              | 3              | 0.123          | 0.208                                    | 0.125                                        | >0.999            |
| 7                             | Burunge of Tanzania <sup>4</sup>                              | 17             | 2              | 1              | 0.059          | 0.065                                    | 0.059                                        | >0.999            |
| 8                             | Hadza of Tanzania <sup>4</sup>                                | 16             | 3              | 2              | 0.280          | 0.551                                    | 0.188                                        | 0.305             |
| 9                             | Sandawe of Tanzania <sup>4</sup>                              | 19             | 5              | 6              | 0.292          | 0.567                                    | 0.316                                        | >0.999            |
| 10                            | Biaka Pygmy of C.A.R. (CEPH) <sup>4</sup>                     | 15             | 3              | 2              | 0.131          | 0.148                                    | 0.133                                        | >0.999            |
| <i>East Asia</i>              |                                                               |                |                |                |                |                                          |                                              |                   |
| 11                            | Han Chinese in Beijing, China <sup>3</sup>                    | 97             | 6              | 6              | 0.051          | 0.080                                    | 0.052                                        | >0.999            |
| 12                            | Southern Han Chinese <sup>3</sup>                             | 100            | 2              | 1              | 0.010          | 0.011                                    | 0.010                                        | >0.999            |
| 13                            | Japanese in Tokyo, Japan <sup>3</sup>                         | 89             | 2              | 3              | 0.022          | 0.074                                    | 0.022                                        | >0.999            |
| 14                            | Cambodian (CEPH) <sup>4</sup>                                 | 20             | 1              | 0              | 0.000          | 0.000                                    | n.a. <sup>6</sup>                            | n.a. <sup>6</sup> |
| <i>Europe</i>                 |                                                               |                |                |                |                |                                          |                                              |                   |
| 15                            | Toscani in Italia <sup>3</sup>                                | 98             | 5              | 6              | 0.127          | 0.318                                    | 0.122                                        | 0.116             |
| 16                            | Utah Residents (CEPH) with N&W European Ancestry <sup>3</sup> | 85             | 5              | 6              | 0.124          | 0.292                                    | 0.129                                        | >0.999            |
| 17                            | British in England and Scotland <sup>3</sup>                  | 89             | 5              | 6              | 0.139          | 0.349                                    | 0.146                                        | >0.999            |
| 18                            | Finnish in Finland <sup>3</sup>                               | 93             | 5              | 6              | 0.104          | 0.141                                    | 0.108                                        | >0.999            |
| <i>America</i>                |                                                               |                |                |                |                |                                          |                                              |                   |
| 19                            | Mexican Ancestry from Los Angeles USA <sup>3</sup>            | 66             | 3              | 4              | 0.045          | 0.117                                    | 0.045                                        | >0.999            |
| 20                            | Puerto Ricans from Puerto Rico <sup>3</sup>                   | 55             | 3              | 4              | 0.036          | 0.081                                    | 0.036                                        | >0.999            |
| 21                            | Colombians from Medellin, Colombia <sup>3</sup>               | 60             | 3              | 4              | 0.081          | 0.200                                    | 0.083                                        | >0.999            |
| 22                            | Americans of African Ancestry in SW USA <sup>3</sup>          | 61             | 4              | 3              | 0.049          | 0.054                                    | 0.049                                        | >0.999            |
| World average for <i>NAT1</i> |                                                               | 59.85          | 3.50           | 3.75           | 0.095          | 0.187                                    |                                              |                   |
| (s.d.) <sup>7</sup>           |                                                               | (34.78)        | (1.32)         | (1.92)         | (0.079)        | (0.162)                                  |                                              |                   |

---

**NAT2***Sub-Saharan Africa*

|    |                                           |    |    |    |       |       |       |       |
|----|-------------------------------------------|----|----|----|-------|-------|-------|-------|
| 2  | Yoruba in Ibadan, Nigeria <sup>3</sup>    | 88 | 20 | 16 | 0.890 | 2.200 | 0.864 | 0.304 |
| 3  | Mandenka of Senegal <sup>5</sup>          | 97 | 16 | 12 | 0.837 | 2.316 | 0.814 | 0.526 |
| 4  | Luhya in Webuye, Kenya <sup>3</sup>       | 97 | 19 | 15 | 0.829 | 2.451 | 0.887 | 0.444 |
| 6  | Turu of Tanzania <sup>4</sup>             | 15 | 13 | 11 | 0.881 | 2.435 | 0.933 | 0.965 |
| 7  | Burunge of Tanzania <sup>4</sup>          | 17 | 10 | 10 | 0.831 | 2.582 | 0.882 | 0.284 |
| 9  | Sandawe of Tanzania <sup>4</sup>          | 18 | 10 | 9  | 0.824 | 2.308 | 0.722 | 0.263 |
| 10 | Biaka Pygmy of C.A.R. (CEPH) <sup>4</sup> | 15 | 11 | 10 | 0.821 | 1.563 | 0.867 | 0.993 |

*East Asia*

|    |                                            |     |   |   |       |       |       |       |
|----|--------------------------------------------|-----|---|---|-------|-------|-------|-------|
| 11 | Han Chinese in Beijing, China <sup>3</sup> | 97  | 6 | 7 | 0.576 | 1.087 | 0.588 | 0.763 |
| 12 | Southern Han Chinese <sup>3</sup>          | 100 | 7 | 7 | 0.652 | 1.275 | 0.660 | 0.197 |
| 13 | Japanese in Tokyo, Japan <sup>3</sup>      | 89  | 5 | 7 | 0.538 | 1.030 | 0.461 | 0.250 |

*Europe*

|    |                                                               |    |   |   |       |       |       |                      |
|----|---------------------------------------------------------------|----|---|---|-------|-------|-------|----------------------|
| 15 | Toscani in Italia <sup>3</sup>                                | 98 | 9 | 8 | 0.707 | 2.172 | 0.643 | 0.058                |
| 16 | Utah Residents (CEPH) with N&W European Ancestry <sup>3</sup> | 85 | 8 | 8 | 0.723 | 2.156 | 0.659 | 0.471                |
| 17 | British in England and Scotland <sup>3</sup>                  | 89 | 7 | 7 | 0.728 | 2.218 | 0.640 | <u>0.042 (0.720)</u> |
| 18 | Finnish in Finland <sup>3</sup>                               | 93 | 7 | 7 | 0.725 | 2.182 | 0.753 | 0.920                |

*America*

|    |                                                      |    |    |    |       |       |       |       |
|----|------------------------------------------------------|----|----|----|-------|-------|-------|-------|
| 19 | Mexican Ancestry from Los Angeles USA <sup>3</sup>   | 66 | 10 | 10 | 0.762 | 2.104 | 0.742 | 0.489 |
| 20 | Puerto Ricans from Puerto Rico <sup>3</sup>          | 55 | 10 | 9  | 0.785 | 2.234 | 0.727 | 0.342 |
| 21 | Colombians from Medellin, Colombia <sup>3</sup>      | 60 | 8  | 8  | 0.725 | 2.063 | 0.750 | 0.689 |
| 22 | Americans of African Ancestry in SW USA <sup>3</sup> | 61 | 17 | 15 | 0.861 | 2.357 | 0.885 | 0.654 |

World average for NAT2

68.89

10.72

9.78

0.761

2.041

(s.d.)<sup>7</sup>

(32.21)

(4.50)

(2.96)

(0.100)

(0.470)

---

**NATP***Sub-Saharan Africa*

|   |                                        |    |    |    |       |       |       |                      |
|---|----------------------------------------|----|----|----|-------|-------|-------|----------------------|
| 1 | Dinka of Soudan <sup>4</sup>           | 15 | 11 | 7  | 0.818 | 1.528 | 0.867 | 0.904                |
| 2 | Yoruba in Ibadan, Nigeria <sup>3</sup> | 88 | 19 | 14 | 0.846 | 2.540 | 0.841 | 0.220                |
| 4 | Luhya in Webuye, Kenya <sup>3</sup>    | 97 | 19 | 14 | 0.822 | 2.416 | 0.887 | 0.642                |
| 6 | Turu of Tanzania <sup>4</sup>          | 15 | 7  | 7  | 0.816 | 1.773 | 0.533 | <u>0.011 (0.211)</u> |
| 7 | Burunge of Tanzania <sup>4</sup>       | 18 | 7  | 6  | 0.781 | 1.286 | 0.778 | 0.792                |

|                               |                                                               |         |        |        |         |         |       |        |
|-------------------------------|---------------------------------------------------------------|---------|--------|--------|---------|---------|-------|--------|
| 9                             | Sandawe of Tanzania <sup>4</sup>                              | 18      | 10     | 7      | 0.676   | 1.331   | 0.833 | >0.999 |
| 10                            | Biaka Pygmy of C.A.R. (CEPH) <sup>4</sup>                     | 15      | 10     | 7      | 0.841   | 1.565   | 0.800 | 0.268  |
| <i>East Asia</i>              |                                                               |         |        |        |         |         |       |        |
| 11                            | Han Chinese in Beijing, China <sup>3</sup>                    | 97      | 8      | 9      | 0.652   | 1.862   | 0.732 | 0.374  |
| 12                            | Southern Han Chinese <sup>3</sup>                             | 100     | 9      | 10     | 0.665   | 1.914   | 0.630 | 0.216  |
| 13                            | Japanese in Tokyo, Japan <sup>3</sup>                         | 89      | 10     | 9      | 0.685   | 2.020   | 0.663 | 0.579  |
| <i>Europe</i>                 |                                                               |         |        |        |         |         |       |        |
| 15                            | Toscans in Italia <sup>3</sup>                                | 98      | 10     | 8      | 0.738   | 1.601   | 0.663 | 0.540  |
| 16                            | Utah Residents (CEPH) with N&W European Ancestry <sup>3</sup> | 85      | 10     | 10     | 0.735   | 1.740   | 0.706 | 0.413  |
| 17                            | British in England and Scotland <sup>3</sup>                  | 89      | 9      | 8      | 0.707   | 1.590   | 0.708 | 0.165  |
| 18                            | Finnish in Finland <sup>3</sup>                               | 93      | 10     | 9      | 0.752   | 1.839   | 0.806 | 0.665  |
| <i>America</i>                |                                                               |         |        |        |         |         |       |        |
| 19                            | Mexican Ancestry from Los Angeles USA <sup>3</sup>            | 66      | 11     | 11     | 0.747   | 1.737   | 0.773 | 0.874  |
| 20                            | Puerto Ricans from Puerto Rico <sup>3</sup>                   | 55      | 10     | 10     | 0.746   | 1.645   | 0.727 | 0.083  |
| 21                            | Colombians from Medellin, Colombia <sup>3</sup>               | 60      | 9      | 8      | 0.768   | 1.862   | 0.783 | 0.620  |
| 22                            | Americans of African Ancestry in SW USA <sup>3</sup>          | 61      | 12     | 12     | 0.800   | 2.214   | 0.852 | 0.814  |
| World average for <i>NATP</i> |                                                               | 64.39   | 10.61  | 9.22   | 0.755   | 1.804   |       |        |
| (s.d.) <sup>7</sup>           |                                                               | (33.68) | (3.31) | (2.34) | (0.061) | (0.334) |       |        |

<sup>1</sup> Sample size ( $n$ ) ; Number of haplotypes ( $k$ ) ; Number of segregating sites ( $S$ ) ; Expected heterozygosity, equivalent to Nei's gene diversity ( $h$ ) ; Nucleotide diversity ( $\pi$ )  $\times 10^{-3}$ .

<sup>2</sup> Test for departure from Hardy-Weinberg equilibrium;  $H_o$  : observed heterozygosity. Significant departures ( $P$ -value  $< 0.05$ ) from equilibrium are underlined. No significant departure remained after Holm's correction for multiple testing ( $P$ -values in brackets).

<sup>3</sup> The Genomes Project Consortium (2012). <sup>4</sup> Mortensen et al. (2011). <sup>5</sup> Sabbagh et al. (2008). <sup>6</sup> Not applicable (n.a.). <sup>7</sup> Standard deviation (s.d.).

## References

Mortensen HM, Froment A, Lema G, Bodo JM, Ibrahim M, Nyambo TB, Omar SA, and Tishkoff SA. 2011. Characterization of genetic variation and natural selection at the arylamine N-acetyltransferase genes in global human populations. *Pharmacogenomics* 12(11):1545-1558.

Sabbagh A, Langaney A, Darlu P, Gerard N, Krishnamoorthy R, and Poloni ES. 2008. Worldwide distribution of NAT2 diversity: implications for NAT2 evolutionary history. *BMC Genet* 9:21.

The Genomes Project C. 2012. An integrated map of genetic variation from 1,092 human genomes. *Nature* 491:56.
