# Supplementary material
Source: publisher figshare collection journal article supplement (https://gsajournals.figshare.com/articles/dataset/_/7928192)
Supplement: Supplementary file 13 [file 2]

**Supplementary Table S10.** Gene product counts translated from haplotype counts of the two *NAT* coding genes in the total samples of the genus *Pan*.

| Samples <sup>1</sup>           | <i>P. t. verus</i> |           |      |      | <i>P. t. ellioti</i> | <i>P. t. troglodytes</i> | <i>P. t. schweinfurthii</i> | Hybrid | <i>P. paniscus</i> |
|--------------------------------|--------------------|-----------|------|------|----------------------|--------------------------|-----------------------------|--------|--------------------|
|                                | CARTA              | Basel zoo | BPRC | GAGP |                      |                          |                             |        |                    |
| <b><i>Pan NAT1</i></b>         |                    |           |      |      |                      |                          |                             |        |                    |
| *1/*2/*6/*12                   | 45                 | 4         | 68   | 5    | 14                   | 7                        | 8                           | 2      | 28                 |
| *3                             | 3                  |           |      |      |                      | 1                        | 1                           |        |                    |
| *4                             | 3                  |           | 14   | 1    |                      |                          |                             |        |                    |
| *5/*10                         | 1                  |           |      |      | 4                    | 1                        | 1                           |        |                    |
| *7                             |                    |           |      |      | 2                    |                          |                             |        |                    |
| *8                             |                    |           |      |      |                      | 1                        |                             |        |                    |
| *9/*11                         |                    |           |      |      |                      |                          | 2                           |        |                    |
| Total sample size <sup>2</sup> | 52                 | 4         | 82   | 6    | 20                   | 10                       | 12                          | 2      | 28                 |
| <b><i>Pan NAT2</i></b>         |                    |           |      |      |                      |                          |                             |        |                    |
| *1/*3/*4/*5                    | 49                 | 4         | 74   | 5    | 3                    | 9                        | 11                          | 2      |                    |
| *2                             | 3                  |           | 8    | 1    |                      |                          |                             |        |                    |
| *6/*10                         |                    |           |      |      | 17                   | 1                        | 1                           |        |                    |
| *7                             |                    |           |      |      |                      |                          |                             |        | 25                 |
| *8                             |                    |           |      |      |                      |                          |                             |        | 1                  |
| *9                             |                    |           |      |      |                      |                          |                             |        | 2                  |
| Total sample size <sup>2</sup> | 52                 | 4         | 82   | 6    | 20                   | 10                       | 12                          | 2      | 28                 |

<sup>1</sup> Samples as described in Supplementary Table S9.

<sup>2</sup> Total sample size in number of chromosomes (2n).
