# Supplementary material
Source: publisher figshare collection journal article supplement (https://gsajournals.figshare.com/articles/dataset/_/7928192)
Supplement: Supplementary file 14 [file 2]

**Supplementary Table S8.** *NAT* genes variant calls in sequenced ancient genomes of the genus *Homo*.

Variant calls are recorded as compared to the human reference sequence (GRCh37/hg19). For *NAT1* and *NAT2*, we screened 2 kb of sequence in the region on chromosome 8 encompassing the coding exon (positions 18'079'000 to 18'081'000 for *NAT1*, and 18'257'000 to 18'259'000 for *NAT2*). For the *NATP* pseudogene, we screened 2 kb of homologous sequence (18'227'600 to 18'229'600). Non-synonymous changes are shown in bold type. Variants located beyond the stretch sequenced in individuals from this study are indicated in italics.

|                                             |                              |                           |                         |                              |                              |                              |                       |                       |                   |                   |                   |
|---------------------------------------------|------------------------------|---------------------------|-------------------------|------------------------------|------------------------------|------------------------------|-----------------------|-----------------------|-------------------|-------------------|-------------------|
| <b><i>NAT1</i> region<br/>(+18'000'000)</b> | 79124                        | 79213                     | 79517                   | <b>80001</b>                 | 80015                        | 80196                        | 80644                 | 80833                 | 80901             | 80923             | 80933             |
| hg19                                        | <i>T</i>                     | <i>C</i>                  | <i>A</i>                | <b>G</b>                     | <i>G</i>                     | <i>T</i>                     | <i>A</i>              | <i>A</i>              | <i>C</i>          | <i>G</i>          | <i>C</i>          |
| SNP ID                                      | <i>rs8190856</i>             | <i>rs4986988</i>          | <i>rs4986989</i>        | <b>rs4987076<br/>(A445G)</b> | <i>rs4986990<br/>(G459A)</i> | <i>rs4986783<br/>(G640T)</i> | <i>rs1057126</i>      | <i>rs28359534</i>     | <i>rs8190862</i>  | <i>rs6982949</i>  | <i>rs8190863</i>  |
| Ust'-Ishim                                  | <i>T/C</i>                   | <i>C/T</i>                | <i>A/T</i>              | <b>G/A</b>                   | <i>G/A</i>                   | <i>T/G</i>                   | <i>A</i>              | <i>A</i>              | <i>C/G</i>        | <i>A</i>          | <i>C/T</i>        |
| Altai                                       | <i>C</i>                     | <i>T</i>                  | <i>A</i>                | <b>A</b>                     | <i>A</i>                     | <i>G</i>                     | <i>A</i>              | <i>A</i>              | <i>G</i>          | <i>A</i>          | <i>T</i>          |
| Vindija                                     | <i>C</i>                     | <i>T</i>                  | <i>T</i>                | <b>A</b>                     | <i>A</i>                     | <i>G</i>                     | <i>T</i> <sup>1</sup> | <i>G</i> <sup>1</sup> | <i>G</i>          | <i>A</i>          | <i>T</i>          |
| Denisova                                    | <i>T</i>                     | <i>C</i>                  | <i>A</i>                | <b>G</b>                     | <i>G</i>                     | <i>T</i>                     | <i>A</i>              | <i>A</i>              | <i>C</i>          | <i>A</i>          | <i>C</i>          |
| <b><i>NAT2</i> region<br/>(+18'200'000)</b> | 57795                        | <b>58316</b>              | 58522                   |                              |                              |                              |                       |                       |                   |                   |                   |
| hg19                                        | <i>C</i>                     | <b>G</b>                  | <i>A</i>                |                              |                              |                              |                       |                       |                   |                   |                   |
| SNP ID                                      | <i>rs1041983<br/>(C282T)</i> | <b>rs1208<br/>(A803G)</b> |                         |                              |                              |                              |                       |                       |                   |                   |                   |
| Ust'-Ishim                                  | <i>C</i>                     | <b>A</b>                  | <i>A</i>                |                              |                              |                              |                       |                       |                   |                   |                   |
| Altai                                       | <i>C/T</i>                   | <b>A</b>                  | <i>A</i>                |                              |                              |                              |                       |                       |                   |                   |                   |
| Vindija                                     | <i>C</i>                     | <b>A</b>                  | <i>A</i>                |                              |                              |                              |                       |                       |                   |                   |                   |
| Denisova                                    | <i>C</i>                     | <b>A</b> <sup>2</sup>     | <i>A/T</i> <sup>3</sup> |                              |                              |                              |                       |                       |                   |                   |                   |
| <b><i>NATP</i> region<br/>(+18'200'000)</b> | 27844                        | 28182                     | 28246                   | 28291                        | 28616                        | 28669                        | 29020                 | 29104                 | 29212             | 29503             | 29533             |
| hg19                                        | <i>C</i>                     | <i>A</i>                  | <i>T</i>                | <i>C</i>                     | <i>T</i>                     | <i>G</i>                     | <i>C</i>              | <i>T</i>              | <i>G</i>          | <i>C</i>          | <i>G</i>          |
| SNP ID                                      | <i>rs4487818</i>             |                           | <i>rs73590295</i>       | <i>rs2898473</i>             | <i>rs35548819</i>            | <i>rs73590297</i>            | <i>rs2172426</i>      | <i>rs74444655</i>     | <i>rs57181121</i> | <i>rs17126565</i> | <i>rs17126568</i> |
| Ust'-Ishim                                  | <i>C</i>                     | <i>A</i>                  | <i>T/C</i>              | <i>A</i>                     | <i>T/C</i>                   | <i>G</i>                     | <i>T</i>              | <i>T/C</i>            | <i>G/A</i>        | <i>C/G</i>        | <i>G/C</i>        |
| Altai                                       | <i>C</i>                     | <i>A</i>                  | <i>C</i>                | <i>A</i>                     | <i>T</i>                     | <i>G</i>                     | <i>T</i>              | <i>C</i>              | <i>A</i>          | <i>G</i>          | <i>C</i>          |
| Vindija                                     | <i>T</i> <sup>1</sup>        | <i>A</i>                  | <i>C</i>                | <i>A</i>                     | <i>T</i>                     | <i>C</i> <sup>1</sup>        | <i>T</i>              | <i>C</i>              | <i>A</i>          | <i>G</i>          | <i>C</i>          |
| Denisova                                    | <i>T</i> <sup>4</sup>        | <i>A/G</i>                | <i>T</i>                | <i>A</i>                     | <i>T</i>                     | <i>G</i>                     | <i>C</i>              | <i>T</i>              | <i>G</i>          | <i>C</i>          | <i>G</i>          |

<sup>1</sup> Only reported in the high-coverage alignments of the Vindija Neandertal genome but not called as variant in the ancient genome browser from the Max Planck Institute for Evolutionary Anthropology.

<sup>2</sup> Apparently reported as unvariable (G) with respect to the human reference sequence in the ancient genome browser from the Max Planck Institute for Evolutionary Anthropology, but reported as A in the high-coverage sequence reads of the Denisova genome in the UCSC Genome Browser.

<sup>3</sup> Only reported in the high-coverage sequence reads of the Denisova genome in the UCSC Genome Browser.

<sup>4</sup> Apparently reported as unvariable (C) with respect to the human reference sequence in the ancient genome browser from the Max Planck Institute for Evolutionary Anthropology, but reported as T in the high-coverage sequence reads of the Denisova genome in the UCSC Genome Browser.
