# Supplementary material
Source: publisher figshare collection journal article supplement (https://gsajournals.figshare.com/articles/dataset/_/7928192)
Supplement: Supplementary file 15 [file 2]

**Supplementary Table S11.** Mann-Withney U and Student *t* tests for equal distributions of diversity levels in *NAT* genes between humans and *Pan*.

|                                                   | <i>P</i> -value<br>(Mann-Whitney U) <sup>1</sup> | <i>P</i> -value<br>(Student <i>t</i> ) <sup>1</sup> |
|---------------------------------------------------|--------------------------------------------------|-----------------------------------------------------|
| <b><i>NAT1</i></b>                                |                                                  |                                                     |
| Expected heterozygosity ( <i>h</i> )              | 0.00090                                          | 0.00060                                             |
| Nucleotide diversity ( $\pi$ )                    | 0.00004                                          | 0.00060                                             |
| <b><i>NAT2</i></b>                                |                                                  |                                                     |
| Expected heterozygosity ( <i>h</i> )              | 0.00090                                          | < 0.00001                                           |
| Nucleotide diversity ( $\pi$ )                    | 0.00007                                          | < 0.00001                                           |
| <b><i>NATP</i></b>                                |                                                  |                                                     |
| Expected heterozygosity ( <i>h</i> ) <sup>2</sup> | 0.07                                             | 0.14                                                |
| Nucleotide diversity ( $\pi$ ) <sup>2</sup>       | 0.29                                             | 0.24                                                |

<sup>1</sup> Adjusted *P*-values of Mann-Withney U and Student *t* tests for equality of diversity levels in humans and *Pan* (including all chimpanzee sub-species and bonobos).

<sup>2</sup> Adjusted *P*-values of Mann-Withney U and Student *t* tests for equality of diversity levels in humans and common chimpanzees (*P. troglodytes*, i.e. not including bonobos): Mann-Whitney U *P*-value = 0.16 and Student *t* *P*-value = 0.28 for *h*, and Mann-Whitney U *P*-value = 0.51 and *t* *P*-value = 0.44 for  $\pi$ , respectively.
