# Supplementary material
Source: publisher figshare collection journal article supplement (https://gsajournals.figshare.com/articles/dataset/_/7928192)
Supplement: Supplementary file 17 [file 2]

**Supplementary Table S14.** Global linkage disequilibrium (GLD) between pairs of *NAT* loci estimated in the two Western chimpanzee (*P. t. verus*) samples and in human population samples.

| Pair of <i>NAT</i> loci   | BPRC           |                 | San Diego      |                                                           |                                            | Humans         |                                                         |
|---------------------------|----------------|-----------------|----------------|-----------------------------------------------------------|--------------------------------------------|----------------|---------------------------------------------------------|
|                           | N <sup>1</sup> | <i>P</i> -value | N <sup>1</sup> | Proportion of sub-samples in significant GLD <sup>2</sup> | Variation of <i>P</i> -values <sup>2</sup> | N <sup>3</sup> | Number of human samples in significant GLD <sup>4</sup> |
| <i>NAT1</i> ~ <i>NAT2</i> | 23             | 1               | 18             | 0 %                                                       | [0.24 - 0.8]                               | 17             | 1 (1)                                                   |
| <i>NAT1</i> ~ <i>NATP</i> | 23             | 0.051           | 18             | 0 %                                                       | [0.24 - 0.92]                              | 17             | 2 (0)                                                   |
| <i>NATP</i> ~ <i>NAT2</i> | 23             | 0.004           | 18             | 34.42%                                                    | [0.026 - 0.27]                             | 17             | 14 (13)                                                 |

<sup>1</sup> Number of individuals in the sample.

<sup>2</sup> Among the 122 sub-samples of the San Diego sample.

<sup>3</sup> Number of human population samples tested.

<sup>4</sup> In brackets, number of samples in significant GLD after correction for multiple testing.
